1  
2  
3  
4  
5  
6  
7  
8  
9  
10  
11  
12  
13  
14  
15  
16  
17  
18  
19  
20

# **IL-27 enhances the lymphocyte mediated innate resistance to primary hookworm infection in the lungs**

Jason B. Noon<sup>§,\*</sup>, Arjun Sharma<sup>§,†,\*</sup>, Johannes Platten<sup>†</sup>, Lee J. Quinton<sup>§</sup>, Christoph Reinhardt<sup>†</sup>,  
and Markus Bosmann<sup>§,†,‡</sup>

<sup>§</sup>Pulmonary Center, Department of Medicine, Boston University School of Medicine, Boston, Massachusetts, 02118, USA

<sup>†</sup>Center for Thrombosis and Hemostasis, University Medical Center of the Johannes Gutenberg University Mainz, 55131, Mainz, Germany

<sup>‡</sup>Research Center for Immunotherapy (FZI), University Medical Center of the Johannes Gutenberg-University Mainz, 55131, Mainz, Germany

\*These authors contributed equally to the work.

Corresponding Author: Markus Bosmann, Associate Professor of Medicine, Pathology & Laboratory Medicine, Pulmonary Center, Department of Medicine, Boston University School of Medicine, Boston, Massachusetts, 02118, USA, Phone: +1-617-358-1225, FAX: +1-617-638-5227. E-mail: [mbosmann@bu.edu](mailto:mbosmann@bu.edu)

**Key words:** Inflammation, parasitic-helminth, cytokines, rodent, immunology

**Total word count:** 5252 words

**Content type:** Article

21 **Abstract**

22 Interleukin-27 (IL-27) is a heterodimeric cytokine of the IL-12 family, formed by non-covalent  
23 association of the promiscuous EBI3 subunit and selective p28 subunit. IL-27 is produced by  
24 mononuclear phagocytes and unfolds pleiotropic immune-modulatory functions through high  
25 affinity ligation to IL-27 receptor alpha (IL-27RA). While IL-27 is known to contribute to  
26 immunity and to end inflammation following numerous types of infections, its relevance for host  
27 defense against multicellular parasites is still poorly defined. Here, we investigated the role of IL-  
28 27 during infection with the soil-transmitted hookworm, *Nippostrongylus brasiliensis*, in its early  
29 intrapulmonary life cycle. IL-27(p28) was detectable in broncho-alveolar lavage fluids of  
30 C57BL/6J wild type mice on day 1 after subcutaneous *N. brasiliensis* inoculation. The expression  
31 of IL-27RA was most abundant on lung invading  $\gamma\delta$  T cells followed by CD8<sup>+</sup> T cells, CD4<sup>+</sup> T  
32 cells and NK cells. IL-27RA was weakly present on CD19<sup>+</sup> B cells and absent on neutrophils,  
33 alveolar macrophages and eosinophils. *Il27ra*<sup>-/-</sup> mice showed increased parasite burden together  
34 with aggravated pulmonary hemorrhage and higher alveolar albumin leakage as a surrogate for  
35 disruption of the epithelial/vascular barrier. Conversely, recombinant mouse IL-27 injections of  
36 wild type mice reduced parasite burdens and lung injury. In multiplex screens, we identified higher  
37 airway accumulations of IL-6, TNF $\alpha$  and MCP-3 (CCL7) in *Il27ra*<sup>-/-</sup> mice, while rmIL-27  
38 treatment showed a reciprocal effect. Finally,  $\gamma\delta$  T cell infiltration of the airways required  
39 endogenous IL-27 expression. In summary, this report demonstrates protective functions of IL-27  
40 to control the early larval stage of hookworm infection in the lungs.

41

## 42 **Introduction**

43 Hookworms are soil-transmitted intestinal nematodes that have a critical stage in development  
44 within the airspaces of the lungs (1). After molting from an infectious third stage (L3) to an L4  
45 stage within the alveolar space, hookworms ascend the trachea and are swallowed, ultimately  
46 infecting the small intestine where they remain as egg-laying adults. In the small intestine,  
47 hookworms rupture vessels and feed on blood, which is the cause of clinical hookworm disease  
48 characterized by iron-deficiency anemia. Over 500 million people worldwide are infected with  
49 hookworms (2, 3), and among all parasites, hookworms are behind only malaria for the leading  
50 causes of iron-deficiency anemia globally (4-7), indicating the importance of these parasites.  
51 Although there are anthelmintic drugs available for treating hookworms (8, 9), people are rapidly  
52 re-infected in endemic areas due to insufficient immunity and high vulnerability for secondary  
53 infections (10). Importantly, there is not a single licensed hookworm vaccine (11), stressing the  
54 value of understanding protective immunity to hookworm infections.

55 Murine hookworm *Nippostrongylus brasiliensis* is a model for human hookworm disease,  
56 particularly for the stage of infection within the lungs, which occurs on days 1 and 2 after  
57 subcutaneous inoculation (12). On day 3, larvae transition to the small intestine and remain until  
58 day 7. There are many publications that indicate the importance of the canonical type 2 response  
59 involving cytokines such as IL-4, IL-5, IL-13 and RELM $\beta$ , along with group 2 innate lymphoid  
60 cells (ILC2s), type 2 T helper (Th2) cells, alternatively activated macrophages, eosinophils,  
61 basophils, mast cells and goblet cells in resistance to secondary *N. brasiliensis* infections in the  
62 lungs (13), which does not occur in humans. However, knowledge on primary *N. brasiliensis*  
63 infection in the lungs is sparse (14, 15). Resistance to primary hookworm infections (in animals)  
64 is widely believed to be localized to the small intestine stage of infection and, in the *N. brasiliensis*

65 model, is well-characterized by canonical type 2-driven expulsion mediated by ILC2s and Th2  
66 cells (13), as well as type 2  $\gamma\delta$  T ( $\gamma\delta$  T2) cells (i.e., intestinal intraepithelial T lymphocytes; IELs)  
67 (16). Although much less is known about primary resistance in the lungs to hookworm infections,  
68 in the *N. brasiliensis* model, IL-17A, neutrophils and  $\gamma\delta$  T cells (14), and interestingly, ILC2s (15)  
69 are involved.

70 IL-27 is a heterodimeric cytokine composed of a unique p28  $\alpha$ -subunit and an EBI3  $\beta$ -  
71 subunit (17). EBI3 is shared with IL-35 (18). The IL-27 receptor is also a heterodimer composed  
72 of a unique IL-27 receptor  $\alpha$ -subunit (IL-27RA, WSX-1) and a gp130  $\beta$ -subunit that is shared with  
73 multiple other cytokine receptors (17, 19, 20). IL-27 is well-described to exert acute pro-  
74 inflammatory effects, enhancing type 1 responses, particularly CD8<sup>+</sup> cytotoxic lymphocytes  
75 (CTLs) and natural killer (NK) cells, thus enhancing protective immunity to intracellular  
76 pathogens and various cancers (21). Consistent with IL-27 enhancing type 1 responses, IL-27  
77 directly suppresses the expansion and activation of ILC2s during the lung repair phase of primary  
78 *N. brasiliensis* infections (22). A more rapid intestinal expulsion is seen in the absence of IL-27  
79 activities in both models of hookworm (studying *Ebi3*<sup>-/-</sup> mice) and whipworm (studying *Il27ra*<sup>-/-</sup>  
80 mice) infections (22, 23). Importantly, there are no publications on IL-27 during early primary *N.*  
81 *brasiliensis* infections in the lungs, or any other helminth infection. As ILC2s are involved in  
82 limiting primary *N. brasiliensis* infections in the lungs (24, 25) and IL-27 antagonizes tissue-  
83 resident ILC2s (26), we initially hypothesized that IL-27 limits resistance to primary *N.*  
84 *brasiliensis* infections in the lungs by suppressing type 2 responses. Interestingly, however, we  
85 found that IL-27 enhances resistance to primary *N. brasiliensis* infections in the lung alveolar space  
86 in association with increased expansion of  $\gamma\delta$  T cells, which we also found to express much higher  
87 levels of IL-27RA compared both CD4<sup>+</sup> Th cells and CD8<sup>+</sup> CTLs.

88 In conclusion, future efforts for the development of a hookworm vaccine may be inspired  
89 by the concept of targeting the lung larval stage and considering adjuvants likely to induce strong  
90 IL-27-dependent immunity (11, 27-29).

91

92

## 93 **Materials and Methods**

### 94 *Mice*

95 All procedures with mice were approved by the Institutional Animal Care and Use Committee of  
96 the Boston University and performed in compliance with the guidelines of the National Institutes  
97 of Health. IL-27RA<sup>-/-</sup> mice (B6N.129P2-II27ra<sup>tm1Mak</sup>/J; on C57BL/6NJ background), C57BL/6NJ  
98 mice and C57BL/6J mice were obtained from the Jackson Laboratory (Bar Harbor, ME). The mice  
99 were bred and genotyped at the animal facilities of the Boston University under specific pathogen-  
100 free conditions and controlled light/dark cycle. Male and female mice at 8-12 weeks of age were  
101 used for experiments.

102

### 103 *Nippostrongylus brasiliensis* cultures and inoculations

104 *N. brasiliensis* coprocultures were provided by Dr. Joseph Urban Jr., United States Department of  
105 Agriculture. L3 were extracted from coprocultures and prepared for inoculations according to an  
106 established protocol (12). Mice were injected subcutaneously in the flank with 500 L3 in 0.1 mL  
107 of sterile PBS (Thermo Fisher Scientific, Waltham, MA).

108

### 109 *Alveolar and lung tissue parasite burdens*

110 To measure alveolar parasite burden, inoculated mice were euthanized by CO<sub>2</sub> overdose, and three  
111 bronchoalveolar lavages (BAL) were collected before vital organ removal. For the first BAL, 1

112 mL PBS containing 1X HALT Protease Inhibitor Cocktail/EDTA (Thermo Fisher Scientific) was  
113 collected into a 1.5 mL tube. PBS only was used for the second and third BAL and were collected  
114 into a 50 mL tube on ice. The first BAL was centrifuged at 400 x g for 8 min at room temperature  
115 and the cell-free supernatant was collected as BAL fluid (BALF) and stored at -80°C for later  
116 analysis. The pellet of BAL cells and containing *N. brasiliensis* larvae was then resuspended in  
117 PBS and transferred to the 50 mL tube along with the additional BAL collections. The combined  
118 BAL was then diluted to 30 mL with PBS and transferred to a 100 mm petri dish with grids drawn  
119 on the bottom surface. All intact *N. brasiliensis* larvae were counted under 20X magnification  
120 (AmScope, Irvine, CA), excluding *N. brasiliensis* debris and obviously dead and deteriorating  
121 larvae. The suspension of BAL cells and *N. brasiliensis* larvae was then transferred back to the 50  
122 mL tube and centrifuged at 800 x g for 8 min at 4°C. The supernatant was removed down to 10  
123 mL, then the BAL cell pellet was resuspended, transferred to a 15 mL tube and centrifuged as  
124 before. The supernatant was removed down to 0.5 mL, then the BAL cell pellet was transferred to  
125 a 1.5 mL tube before further analysis. To measure parasite burden in lung tissues, lungs were  
126 collected from inoculated mice after BAL collections into 35 mm petri dishes. Lungs were minced  
127 with a surgical scissors, resuspended in 5 mL of a 37°C slurry of 1% agarose, and then pipetted  
128 onto a flattened layer of cheesecloth. Once solidified, the cheesecloth was rolled up and placed in  
129 a submerging vessel of 45 mL PBS in a 50 mL tube, with a small piece of the cheesecloth secured  
130 between the tube and lid, and then incubated in 37°C overnight. Larvae that migrated out of the  
131 lung tissues and agarose were counted under 20X magnification.

132

133 *Alveolar injury*

134 BALF total protein was measured with a Pierce BCA Protein Assay Kit (Thermo Scientific).  
135 Alveolar hemorrhage was assessed as described elsewhere (30), but with the following  
136 modifications. A 6X 2-fold serial dilution (8000-250  $\mu\text{g/mL}$ ) of human hemoglobin (Sigma, St.  
137 Louis, MO) was prepared, and 50  $\mu\text{L}$  of each standard and BAL sample was added to duplicate  
138 wells of a 96-well plate. A volume of 100  $\mu\text{L}$  of 6% sodium dodecyl sulfate (Sigma) was added to  
139 all wells and resuspended several times. The absorbance at 560 nm was measured with a Tecan  
140 Infinite M Nano plate reader (Tecan, Männedorf, Switzerland), and alveolar hemorrhage (i.e., total  
141 amount of hemoglobin recovered in BAL) was determined from the standard curve generated by  
142 Magellan V 7.2 (Tecan) software.

143

#### 144 *ELISA & multiplex bead-based immunoassay*

145 IL-27(p28) in BALF was measured with a mouse IL-27 p28/IL-30 DuoSet ELISA (R&D Systems,  
146 Minneapolis, MN), according to the manufacturer's instructions. The absorbance at 450 nm was  
147 measured with a Tecan Infinite M Nano plate reader, and concentration was determined from the  
148 standard curve generated by Magellan software.

149 A multiplex bead-based immunoassay (Cytokine & Chemokine 26-Plex Mouse  
150 ProcartaPlex™ Panel 1, Thermo Fisher Scientific) was used for simultaneous quantification of the  
151 following cytokines/chemokines: IL-1 $\beta$ , IL-2, IL-4, IL-5, IL-6, IL-9, IL-10, IL-12p70, IL-13, IL-  
152 17A, IL-18, IL-22, IL-23, IL-27, GRO $\alpha$  (CXCL-1), IP-10 (CXCL-10), MCP-1 (CCL-2), MCP-3  
153 (CCL-7), MIP-1 $\alpha$  (CCL-3), MIP-1 $\beta$  (CCL-4), MIP-2 (CXCL-2), RANTES (CCL-5), Eotaxin  
154 (CCL-11), GM-CSF, IFN gamma, and TNF alpha (31). All samples from bead-based assays were  
155 performed using a LiquiChip-200 instrument (Qiagen, Hilden, Germany) using Bio-Plex Manager  
156 v6.1 software for quantification.

157

158 *Flow Cytometry*

159 Fresh BAL cells were collected from inoculated mice as described above. In multiple experiments  
160 using our standard operating procedures, >99% of BAL cells were found to be negative for fixable  
161 viability dye eFlour 780 (eBioscience, ThermoFisher Scientific), and hence, all BAL cells are  
162 considered alive. BAL cells collected in a 15 mL tube were centrifuged 800 x g at 4°C for 8 min,  
163 and then resuspended in the following mouse antibody staining cocktails, transferred to 1.5 mL  
164 tubes, and then incubated in the dark for 30 min at 4°C: Myeloid-lymphocyte common lineage  
165 panel – TruStain FcX (anti-CD16/32) (clone: 93; dilution: 1:100, BioLegend, San Diego, CA),  
166 CD45-Pacific Blue (clone: 30-F11; dilution 1:200, BioLegend), Ly6G-APC (clone: 1A8; dilution:  
167 1:400, BioLegend), Siglec-F-APC/Cy7 (clone: E50-2440; dilution: 1:200, BioLegend), CD11c-  
168 Alexa Fluor 488 (clone: N418; dilution: 1:600, BioLegend), CD3-BUV737 (clone: 145-2C11;  
169 dilution: 1:100, BD Biosciences, San Jose, CA ), CD19-PE/Cy7 (clone: 6D5; dilution: 1:100,  
170 BioLegend), NK1.1-PerCP/Cy5.5 (clone: PK136; dilution: 1:100, BioLegend), IL-27RA-PE  
171 (clone: 2918; dilution: 1:100, BD Biosciences); T cell panel – TruStain FcX (anti-CD16/32)  
172 (clone: 93; dilution: 1:100, BioLegend), CD3-BUV737 (clone: 145-2C11; dilution: 1:100, BD  
173 Biosciences), TCR $\beta$  chain-PE/Cy7 (clone: H57-597; dilution: 1:100, BioLegend), CD4-Alexa  
174 Fluor 488 (clone: RM4-5; dilution 1:400, BioLegend), CD8a-APC/Cy7 (clone: 53-6.7; dilution:  
175 1:100, BioLegend), TCR $\gamma\delta$ -APC (clone: GL3; dilution: 1:00, BioLegend), NK1.1-PerCP/Cy5.5  
176 (clone: PK136; dilution: 1:100, BioLegend), IL-27RA-PE (clone: 2918; dilution: 1:100, BD  
177 Biosciences) or PE Rat IgG2a,  $\kappa$  Isotype Control (clone: R35-95; dilution: 1:100, BD Biosciences).  
178 All antibodies were diluted in FACS buffer prepared from sterile PBS and supplemented with  
179 0.25% (w/v) BSA, 0.02% (w/v) sodium azide and 2 mM EDTA. The stained cells were rinsed in



180 FACS buffer, and then fixed in 2% paraformaldehyde (Santa Cruz Biotechnology, Dallas, TX) at  
181 room temperature for 20 min. Stained/fixed cells were centrifuged as described before,  
182 resuspended in FACS buffer and transferred to a FACS tube containing 20  $\mu$ L of CountBright  
183 Absolute Counting Beads (ThermoFisher Scientific). For all single-stained compensation controls,  
184 we used OneComp eBeads Compensation Beads (Invitrogen) according to the manufacturer's  
185 instructions. Flow cytometric analysis was performed on a BD LSR II flow cytometer with BD  
186 FACSDiva software. Final plots were made in FlowJo v10.

187

#### 188 *Reagents*

189 Recombinant mouse IL-27 (<1.0 EU per 1  $\mu$ g of the rmIL-27 protein by the LAL method) was  
190 purchased from R&D systems.

191

#### 192 *Data analysis*

193 Statistical analyses were performed and graphs were prepared in Prism v7.04-v8.4.3 (GraphPad  
194 Software). Data in bar graphs are depicted as mean  $\pm$  standard error of the mean (S.E.M.), with  
195 overlaid symbols representing values from individual mice. Two-group single comparisons were  
196 made with a t-test (with parametric data pre-confirmed using the F test). Multiple comparisons  
197 were made with a one-way ANOVA followed by Tukey's post hoc test. *P* values <0.05 were  
198 considered significant. *P* values <0.1 were considered as a trend.

199

200 **Results**

201 *IL-27(p28) is transiently elevated in alveolar space during primary N. brasiliensis infection of the*  
202 *lungs*

203 While *N. brasiliensis* infection is well known, to induce an eosinophilic and Th2 cell dependent  
204 immune response, the role of the immune-modulatory cytokine IL-27 is not well described in the  
205 pulmonary state of the hookworm infection cycle. To test if IL-27(p28) is released during primary  
206 *N. brasiliensis* infection of the lungs, C57BL/6J mice (wild type, WT) were inoculated with n=500  
207 *N. brasiliensis* L3, and EDTA-plasma was collected on days 0, 1, 2, 6 and 9 following infection.  
208 BALF was collected on days 0, 1, 2 and 9 post infection (p.i.). Circulating IL-27(p28) was not  
209 detectable in EDTA-plasma by ELISA at any of the studied time points, even though all mice were  
210 confirmed to be highly infected with an average of 40,000 eggs per gram of feces on day 6 p.i.  
211 (data not shown). However, in BALF, IL-27(p28) was elevated by ~2.6-fold on day 1 p.i.  
212 compared to day 0 ( $P<0.0001$ , Fig. 1). The concentrations of IL-27(p28) returned to normal levels  
213 by day 2 (Fig. 1). Thus, these results indicate that IL-27(p28) is transiently released specifically in  
214 the alveolar space during primary *N. brasiliensis* infection of the lungs. The bulk of IL-27 may  
215 avidly bind to its receptor for rapid clearance or altogether escape detection in cell-free BALF.

216

217 *IL-27RA is highly expressed on T cells in alveolar space during primary pulmonary N. brasiliensis*  
218 *infection*

219 To study if IL-27RA is expressed on invading immune cells in the broncho-alveolar space during  
220 primary *N. brasiliensis* infection of the lungs, we first confirmed leukocyte dynamics in BAL from  
221 C57BL/6J mice on days 0, 1 and 2 p.i. with *N. brasiliensis* larvae. Within the myeloid lineage, we  
222 recovered an average of ~70,000 CD11c<sup>+</sup>Siglec-F<sup>+</sup> resident alveolar macrophages per mouse in

223 BAL on day 0 in sham mice (Fig. S1A, S1B). The numbers of alveolar macrophages were similar  
224 in BAL on day 1 p.i., while recovery of this cell type increased to ~120,000 in BAL by day 2 p.i.  
225 (Fig. S1A, S1B). In addition, while no Ly6G<sup>+</sup> neutrophils or CD11c<sup>-</sup>Siglec-F<sup>+</sup> eosinophils were  
226 present in BAL of sham mice, the numbers of these myeloid cells substantially increased over the  
227 course of 2 days following *N. brasiliensis* infection (Fig. S1B). Furthermore, within the  
228 lymphocyte lineage, while few cells were detectable in day 0 p.i. BAL, accumulation of  
229 CD19<sup>+</sup>CD3<sup>-</sup> B cells, CD19<sup>-</sup>CD3<sup>+</sup> T cells and CD19<sup>-</sup>CD3<sup>-</sup>NK1.1<sup>+</sup> NK cells was detected on day 1  
230 and further elevated on day 2 (Fig. 2A, 2B). Thus, all investigated myeloid and lymphoid cells  
231 increase in the alveolar space during the natural course of primary *N. brasiliensis* infection.

232 Essentially none of the three myeloid cell types (neutrophils, eosinophils, alveolar  
233 macrophages) present in BAL after infection were found to express IL-27RA at any time point  
234 evaluated (Fig. S1C). However, an average of 80.2%, 56.1% and 23.1% of CD19<sup>-</sup>CD3<sup>+</sup> T cells,  
235 CD19<sup>-</sup>CD3<sup>-</sup>NK1.1<sup>+</sup> NK cells and CD19<sup>+</sup>CD3<sup>-</sup> B cells were IL-27RA<sup>+</sup>, and these percentages were  
236 similar on both day 1 and 2 p.i. (Fig. 2C, 2D). Geometric mean fluorescence intensities (gMFI) of  
237 IL-27RA were 2-fold greater on CD19<sup>-</sup>CD3<sup>+</sup> T cells on day 2 compared to day 1 p.i. (suggesting  
238 T cell-specific upregulation of IL-27RA, Fig. 2E), while IL-27RA gMFI was similar on CD19<sup>-</sup>  
239 CD3<sup>-</sup>NK1.1<sup>+</sup> NK cells and CD19<sup>+</sup>CD3<sup>-</sup> B cells at the two time points studied (Fig. 2E). Moreover,  
240 IL-27RA gMFI was >3-fold higher on CD19<sup>-</sup>CD3<sup>+</sup> T cells compared to CD19<sup>-</sup>CD3<sup>-</sup>NK1.1<sup>+</sup> NK  
241 cells and CD19<sup>+</sup>CD3<sup>-</sup> B cells. Hence, the frequency and magnitude of IL-27RA expression is  
242 greatest on CD19<sup>-</sup>CD3<sup>+</sup> T cells in the alveolar space during primary *N. brasiliensis* infection of  
243 the lungs.

244 We next evaluated the numbers of different T cell subsets in the alveolar space during  
245 primary pulmonary *N. brasiliensis* infection, and for their expression of IL-27RA. Both

246 TCR $\beta^+$ CD4 $^+$  Th cells and TCR $\beta^+$ CD8 $^+$  CTLs became considerably more abundant than TCR $\beta^-$   
247 TCR $\gamma\delta^+$   $\gamma\delta$  T cells after *N. brasiliensis* infection, while none of these lymphocyte populations were  
248 present in BAL from uninfected mice (Fig. 3A, 3B). The numbers of TCR $\beta^+$ CD4 $^+$  Th cells,  
249 TCR $\beta^+$ CD8 $^+$  CTLs and TCR $\beta^-$ TCR $\gamma\delta^+$   $\gamma\delta$  T cells further increased from day 1 to day 2 (Fig. 3A,  
250 3B). Moreover, >40% of all three subsets were IL-27RA $^+$  (Fig. 3C, 3D). There was a significantly  
251 higher percentage of IL-27RA $^+$ TCR $\beta^-$ TCR $\gamma\delta^+$   $\gamma\delta$  T cells compared to IL-27RA $^+$ TCR $\beta^+$ CD8 $^+$   
252 CTLs and IL-27RA $^+$ TCR $\beta^+$ CD4 $^+$  Th cells, while there was not a significant difference between  
253 IL-27RA $^+$ TCR $\beta^+$ CD8 $^+$  CTLs and IL-27RA $^+$ TCR $\beta^+$ CD4 $^+$  Th cells (Fig. 3D). Furthermore, TCR $\beta^-$   
254 TCR $\gamma\delta^+$   $\gamma\delta$  T cells resulted in significantly higher IL-27RA gMFI compared to both TCR $\beta^+$ CD8 $^+$   
255 CTLs and TCR $\beta^+$ CD4 $^+$  Th cells, and TCR $\beta^+$ CD8 $^+$  CTLs resulted in significantly higher IL-27RA  
256 gMFI compared to TCR $\beta^+$ CD4 $^+$  Th cells (Fig. 3E). Thus, IL-27RA is most prevalent and most  
257 highly expressed on  $\gamma\delta$  T cells, but Th cells and CTLs dominate the T cell population in the alveolar  
258 space during primary *N. brasiliensis* infection of the lungs.

259

#### 260 *IL-27 signaling enhances resistance to primary N. brasiliensis infections in the lungs*

261 To determine if IL-27 has a beneficial or detrimental role during primary *N. brasiliensis* infection  
262 of the lungs, we first inoculated Il27ra $^{-/-}$  mice and C57BL/6NJ wild type (WT) mice with 500 *N.*  
263 *brasiliensis* L3 and compared alveolar parasite burden, hemorrhage and total protein on day 2 p.i..  
264 Strikingly, Il27ra $^{-/-}$  mice showed a 2.2-fold increase in alveolar parasite burdens compared to WT  
265 mice (Fig. 4A). We confirmed that the majority of parasites are recovered by the BAL procedure  
266 with only few remaining larvae in lung tissues (Fig. S2). To evaluate the severity of parasite-  
267 induced lung injury, we determined hemoglobin concentrations in BAL as a marker for airway  
268 hemorrhage and broncho-alveolar albumin as a surrogate endpoint for the disturbance of the

269 epithelial/vascular barrier function. A significant 1.9-fold increase in alveolar hemorrhage in  
270 Il27ra<sup>-/-</sup> mice compared to WT mice was observed in line with the greater parasite burden of Il27ra<sup>-</sup>  
271 <sup>-</sup> mice (Fig. 4B). Moreover, and also consistent with the greater parasite burden, a moderate but  
272 significant 1.3-fold increase in total protein leakage was detected in the BALF of Il27ra<sup>-/-</sup> mice  
273 (Fig. 4C), indicating an increase in proteinaceous edema.

274 Next, we tested whether administration of exogenous IL-27 would further reduce the  
275 severity of *N. brasiliensis* infection in the lungs of WT mice. Therefore, we administered 100 ng  
276 recombinant mouse IL-27 (rmIL-27) intraperitoneally on days 0 and 1 p.i. in C57BL/6J mice and  
277 compared alveolar parasite burden and injury with a carrier/mock alone group. The rmIL-27  
278 treatment significantly reduced the alveolar parasite burden to 65% of mock controls (Fig. 4D). In  
279 addition, alveolar hemorrhage was significantly decreased to 72% of mock controls (Fig. 4E),  
280 while there was a slight, albeit statistically insignificant, decrease in total alveolar protein leakage  
281 (Fig. 4F). Taken together, these results indicate that both endogenous IL-27/IL-27RA signaling  
282 and therapeutic recombinant IL-27 enhance the innate resistance to primary *N. brasiliensis*  
283 infection during the early lung larval stage.

284

285 *IL-27 modulates the local presence of proinflammatory cytokines and chemokines.*

286 To characterize the influence of IL-27 on the local milieu of inflammatory mediators, we employed  
287 a high-sensitive, multiplexed bead-based assay to quantify the concentrations of 26 cytokines and  
288 chemokines (Fig. 5, S3, S4). Il27ra<sup>-/-</sup> mice along with wild type (WT) control mice were inoculated  
289 with *N. brasiliensis* L3 and BALF was collected 2 days later. Significant differences were observed  
290 for 5 of 26 mediators. IL-6 concentrations were ~2-fold greater in Il27ra<sup>-/-</sup> mice (Fig. 5A). TNFα  
291 was also significantly increased in Il27ra<sup>-/-</sup> mice, although levels were near the lower detection

292 limit of the assay, possibly owing to the time point chosen (Fig. 5A). The macrophage and T cell-  
293 driving chemokine, MCP-3, was 2-fold higher in *Il27ra*<sup>-/-</sup> mice (Fig. 5A). In addition, we detected  
294 a trend towards lower concentrations for IL-23 ( $p = 0.09$ ), a proinflammatory cytokine which is  
295 known to modulate T cell activity (Fig. 5A). Moreover, lower IL-10 concentrations and higher IL-  
296 17 amounts were detected (Fig. S3) in *Il27ra*<sup>-/-</sup> mice, which is consistent with the known  
297 requirement of IL-27 signaling to induce IL-10 from T cells and to suppress IL-17 responses in  
298 other disease models (32-34).

299 To further elaborate on the findings with *Il27ra*<sup>-/-</sup> mice, we measured inflammatory  
300 mediators in BALF of *N. brasiliensis* infected WT mice two days after a treatment regimen of  
301 rmIL-27 (100 ng i.p. on day 0 and day 1 p.i.) or mock injections. IL-6 was again observed to be  
302 present in abundant quantities, especially when considering the substantial dilution of alveolar  
303 lining fluid introduced by the lavage procedure (Fig. 5B). In contrast to the effect of IL-27  
304 deficiency, IL-6 was suppressed by the addition of rmIL-27 (Fig. 5B). Likewise, mice that receive  
305 rmIL-27 were found to have lower TNF $\alpha$  and MCP-3 (Fig. 5B). Interestingly, no increase in IL-  
306 27 itself was detected in BALF 2 days after rmIL-27 injection (Fig. S4), suggesting clearance prior  
307 to that time point. In fact, we noticed a trend for suppressed (endogenous) IL-27 after injection,  
308 possibly attributable to a post excitation phenomenon.

309

310 *Absence of IL-27 signaling decreases the expansion of  $\gamma\delta$  T cells in the alveolar space during*  
311 *primary *N. brasiliensis* infection*

312 As T cells by far have the highest expression of IL-27RA (Fig. 2C-E), and all three T cell subsets  
313 evaluated express IL-27RA (albeit highest on TCR $\beta$ -TCR $\gamma\delta$ <sup>+</sup>  $\gamma\delta$  T cells; Fig. 3), we next compared  
314 the percentage and number of all three T cell subsets in day 2 p.i. BAL between WT and *Il27ra*<sup>-/-</sup>

315 mice. Compared to WT mice we observed a significant 1.4-fold reduction in the percentage of  
316  $\text{TCR}\beta^-\text{TCR}\gamma\delta^+$   $\gamma\delta$  T cells, a 1.3-fold reduction in percentage of  $\text{TCR}\beta^+\text{CD8}^+$  CTLs and a slight  
317 increase in percentage of  $\text{TCR}\beta^+\text{CD4}^+$  Th cells (Fig. 6A, 6B) in  $\text{Il27ra}^{-/-}$  mice. Moreover, BALs  
318 from  $\text{Il27ra}^{-/-}$  mice exhibited a 1.5-fold reduction in the absolute number of  $\text{TCR}\beta^-\text{TCR}\gamma\delta^+$   $\gamma\delta$  T  
319 cells, while the counts of  $\text{TCR}\beta^+\text{CD4}^+$  Th cells and  $\text{TCR}\beta^+\text{CD8}^+$  CTLs were unchanged. Thus,  
320 these findings support a role for IL-27 in enhancing the expansion of  $\gamma\delta$  T cells in the alveolar  
321 space during primary *N. brasiliensis* infections of the lungs.

322

323 **Discussion**

324 In this report, we have identified a functional role for IL-27 signaling for protective immune  
325 defense against hookworm larvae, which migrate from the pulmonary vasculature into the airways.  
326 IL-27RA was expressed on all airway invading lymphocytes, albeit differentially based on cellular  
327 subset. IL-27RA was particularly abundant on  $\gamma\delta$  T cells compared to other innate and adaptive  
328 lymphocytes, suggesting this cell type as a prominent target for IL-27 mediated defense in the  
329 current setting. To this end, genetic deficiency of IL-27RA resulted in a greater parasite burden  
330 and more severe lung injury, whereas the opposite was true following IL-27 treatment. These  
331 findings were associated with differences in local proinflammatory cytokines and  $\gamma\delta$  T cell  
332 numbers in *Il27ra*<sup>-/-</sup> mice.

333 IL-27-dependent changes occurred within the first two days of infection, suggesting that  
334 its beneficial roles stem from alterations in innate immunity, especially given the time required for  
335 antigen-specific T cell responses. Yet, cytokine-induced T cells can modulate inflammation  
336 independently of their T cell receptor (35, 36), such that their accumulation in the airspaces may  
337 indeed contribute to the inflammatory milieu in some capacity.

338 Innate immunity to helminths is widely accepted to be limited to expulsion, a canonical  
339 type 2 response orchestrated by Th2 cells, ILC2s and  $\gamma\delta$  T2 IECs that, in the case of hookworm  
340 infections, is not initiated until the adult stage of the life cycle in the small intestine (13, 16). Innate  
341 immune mechanisms responsible for defense against helminth infections within the lungs has  
342 received much less attention, likely due to the gut being the conserved final destination for the  
343 majority of helminths. We demonstrate that there are mechanisms of innate resistance to  
344 hookworm infection in the lungs that are not necessarily associated with type 2 responses. As a  
345 key booster of pulmonary resistance to hookworms, we found that IL-27 is transiently induced for



346 expansion of  $\gamma\delta$  T cells in the alveolar space, where we anticipate their accumulation to directly  
347 and/or indirectly eradicate larvae prior to their transition to the small intestine. Our results strongly  
348 suggest that the role of IL-27 in the lung stage of hookworm infection is the opposite of the stage  
349 in the gut, being anti-parasitic for the former and pro-parasitic for the latter (22).

350         The downregulation of IL-6 production by IL-27 (Fig. 5) may be a direct effect, since  
351 lymphocytes can both produce and respond to IL-6 (37, 38). Alternatively, changes in IL-6 may  
352 occur as an indirect consequence of IL-27RA-expressing NK cells and T cells dispatching signals  
353 to control IL-6 synthesis in other non-lymphocytic cells. The precise role of IL-6 in lung injury  
354 and pulmonary inflammation appears to be somewhat dependent on the disease model (39, 40).

355         The chemokine MCP-3 (CCL7) shares 71% sequence similarity with MCP-1 (CCL2) and  
356 binds to the CCR2 receptor (41, 42). CCR2 is constitutively expressed not only on  
357 monocytes/macrophages, but also on T cells, including IL-17 producing  $\gamma\delta$  T cells (43). However,  
358 the higher concentrations of MCP-3 in *Il27ra*<sup>-/-</sup> mice during hookworm infection seem to contradict  
359 the lower influx of  $\gamma\delta$  T cells in these mice (Fig. 5A vs. Fig. 6C). The increased MCP-3 may rather  
360 represent an ineffective compensatory feedback loop to bring back up T cell numbers, when too  
361 low. IL-27 itself is not a chemokine, but gp130-induced JAK/STAT1/STAT3 signaling may  
362 regulate expression of chemokines, chemokine receptors and T cell migration (44, 45). Another  
363 possibility is that elevated MCP-3 is secondary to the increase in pathogen burden resulting from  
364 IL-27 deficiency, making the precise roles of MCP-3 speculative at present.

365         IL-27 is almost exclusively produced by macrophages and dendritic cells (20, 46). Here,  
366 we have detected IL-27RA expression on all lung lymphocyte subpopulations during hookworm  
367 infection, which is consistent with abundant evidence highlighting the responsiveness and  
368 functional roles of IL-27 in T cells and B cells (20, 47). On the other hand, we did not observe IL-

369 27RA expression on mouse myeloid cells in lungs. In fact, the expression of IL-27RA on myeloid  
370 cells appears to occur in dependency of cell maturation and species (48-52). IL-27RA expression  
371 and IL-27 responsiveness exist for human neutrophils and human monocytes, whereas mouse  
372 macrophages only display minimal responsiveness (53, 54). We caution that none of the earlier  
373 reports have assessed IL-27RA expression in a cell-specific capacity (as accomplished by flow  
374 cytometry in the present study), but instead relied on RT-PCR or western blotting of cell lysates,  
375 making conclusive determination of cellular source somewhat speculative.

376         The regulatory role of IL-27 for the host immune defense against helminths does not appear  
377 to be limited to hookworms. Dual deficiency of IL-27RA and IL-10 rescues the great susceptibility  
378 of IL-10 single knockout mice for intestinal pathology and infection caused by the nematode  
379 *Trichuris muris* (55). *Strongyloides stercoralis*, the causative threadworm of Strongyloidiasis,  
380 infects more than 50 million people worldwide and infection results in a moderate but significant  
381 increase of IL-27 in human plasma, which decreases after anthelmintic treatment (56).

382 In human whole blood cultures of infected individuals re-stimulated with recombinant *S.*  
383 *stercoralis* NIE antigen, the neutralization of IL-27 using antibodies increased the frequencies of  
384 all CD4<sup>+</sup> T helper cell subsets (T<sub>h1</sub>-T<sub>h22</sub>), CD8<sup>+</sup> T cells and modulated cytokine levels (57). *Ascaris*  
385 *lubricoides* antigen induced IL-27 release from PBMCs in adults and the elderly as compared to  
386 neonates and children of an endemic cohort from Sub-Saharan Africa, with a 30% prevalence of  
387 hook worm infections and multiple parasite infections (58). Altogether, these observations suggest  
388 an important influence of IL-27 on host outcome in a variety of settings of helminthic infections.

389         The mechanisms of innate immune recognition for helminths remain unclear. No dedicated  
390 class of pattern recognition receptors has been identified so far. Helminth-derived chitin,  
391 proteoglycans, lipids and excretory-secretory products may be recognized by TLRs and C-type

392 lectins (59, 60). In addition, danger associated molecular patterns (DAMPs) when released during  
393 helminth-induced tissue injury could act as endogenous ligands for TLRs (and other receptors),  
394 thereby inducing MYD88/TRIF-dependent IL-27 production (46, 61, 62). Furthermore,  $\gamma\delta$  T cells  
395 can be activated by DAMPs from mitochondria (63).

396         While we describe in this report that recombinant IL-27 reinforced the anthelmintic host  
397 defense in the lungs, the feasibility of proposing its administration as an effective therapy is highly  
398 speculative. First, the efficacy observed in our studies was less than 50% for reduction of the lung  
399 larvae burden in IL-27-treated mice, although this could be improved by further dose optimization.  
400 Secondly, the skin penetration of hookworm larvae in humans usually is unnoticed, such that any  
401 window of therapeutic efficacy may be too difficult to rely on. Thirdly, another report showed that  
402 a non-viral minicircle DNA vector injected intra-venously for recombinant expression of IL-27  
403 resulted in higher numbers of adult *N. brasiliensis* in the intestinal tract (22). This implies that the  
404 role of IL-27 could be either protective or detrimental depending on the stage of the hookworm  
405 infection cycle and host tissue environment. It appears that more sophisticated manipulations  
406 would be needed to specifically enhance IL-27-dependent protective immunity in the lung. IL-27  
407 may be an interesting factor to explore for developing adjuvants for vaccines that target the early  
408 lung stage of human hookworms (11). Vaccine adjuvants would need to be tailored to locally  
409 induce IL-27 (27-29), or to up-regulate IL-27RA expression and IL-27 responsiveness of lung  
410 resident lymphocyte subpopulations (64).

411         In conclusion, the presented work expands on the emerging role of IL-27 as a critical factor  
412 of host defense and immune regulation against hookworm infections. The pulmonary stage of the  
413 parasitic infection cycle remains an understudied area and we highlight the importance to better  
414 understand the lung lymphocyte-specific host response. In the future, more research will be needed

415 to fully uncover the intricate molecular mechanisms of host-helminth interactions as a basis for  
416 developing innovative treatment approaches against this neglected tropical disease.  
417

418 **Acknowledgments**

419 We thank Dr. Joseph Urban Jr. (USDA, Beltsville, MD) for kindly providing the murine  
420 hookworm *N. brasiliensis*. This work was supported by the National Institutes of Health  
421 (1R01HL141513, 1R01HL139641 to M.B.), the Federal Ministry of Education and Research  
422 (01EO1503 to M.B. and C.R.), the Deutsche Forschungsgemeinschaft (BO3482/3-3, BO3482/4-1  
423 to M.B. and RE-3450/5-2 to C.R.), a Marie Curie Career Integration Grant of the European Union  
424 (Project 334486 to M.B.), a Clinical Research Fellowship of the European Hematology  
425 Association (to M.B.) and a project grant from the Boehringer Ingelheim Foundation (Consortium  
426 Grant "Novel and neglected cardiovascular risk factors" to C.R.). C.R. was awarded a fellowship  
427 from the Gutenberg Research College. The authors are responsible for the contents of this  
428 publication.

429

430 **Author Contributions**

431 J.B.N. and A.S. designed and performed experiments and analyzed data. J.P. and C.R. contributed  
432 to experimental designs and provided helpful comments. M.B. conceived and supervised the study,  
433 designed experiments, interpreted data and provided funding. J.B.N. and M.B. wrote the  
434 manuscript, which was further edited by A.S., L.J.Q. and C.R.

435

436 **Correspondence and requests for materials**

437 Requests for materials and correspondence should be addressed to M.B.

438

439 **Disclosures**

440 The authors have no financial conflicts of interest.

## 441 References

- 442 1. Loukas, A., P. J. Hotez, D. Diemert, M. Yazdanbakhsh, J. S. McCarthy, R. Correa-  
443 Oliveira, J. Croese, and J. M. Bethony. 2016. Hookworm infection. *Nat Rev Dis Primers*  
444 2: 16088.
- 445 2. Pullan, R. L., J. L. Smith, R. Jasrasaria, and S. J. Brooker. 2014. Global numbers of  
446 infection and disease burden of soil transmitted helminth infections in 2010. *Parasit*  
447 *Vectors* 7: 37.
- 448 3. Herricks, J. R., P. J. Hotez, V. Wanga, L. E. Coffeng, J. A. Haagsma, M. G. Basanez, G.  
449 Buckle, C. M. Budke, H. Carabin, E. M. Fevre, T. Furst, Y. A. Halasa, C. H. King, M. E.  
450 Murdoch, K. D. Ramaiah, D. S. Shepard, W. A. Stolk, E. A. Undurraga, J. D. Stanaway,  
451 M. Naghavi, and C. J. L. Murray. 2017. The global burden of disease study 2013: What  
452 does it mean for the NTDs? *PLoS Negl Trop Dis* 11: e0005424.
- 453 4. Brooker, S., P. J. Hotez, and D. A. Bundy. 2008. Hookworm-related anaemia among  
454 pregnant women: a systematic review. *PLoS Negl Trop Dis* 2: e291.
- 455 5. Smith, J. L., and S. Brooker. 2010. Impact of hookworm infection and deworming on  
456 anaemia in non-pregnant populations: a systematic review. *Trop Med Int Health* 15: 776-  
457 795.
- 458 6. Hotez, P. J., S. Brooker, J. M. Bethony, M. E. Bottazzi, A. Loukas, and S. Xiao. 2004.  
459 Hookworm infection. *N Engl J Med* 351: 799-807.
- 460 7. Kassebaum, N. J., and G. B. D. A. Collaborators. 2016. The Global Burden of Anemia.  
461 *Hematol Oncol Clin North Am* 30: 247-308.
- 462 8. Hotez, P. J., D. A. P. Bundy, K. Beegle, S. Brooker, L. Drake, N. de Silva, A. Montresor,  
463 D. Engels, M. Jukes, L. Chitsulo, J. Chow, R. Laxminarayan, C. Michaud, J. Bethony, R.  
464 Correa-Oliveira, X. Shuhua, A. Fenwick, and L. Savioli. 2006. Helminth Infections: Soil-  
465 transmitted Helminth Infections and Schistosomiasis. In *Disease Control Priorities in*  
466 *Developing Countries*. nd, D. T. Jamison, J. G. Breman, A. R. Measham, G. Alleyne, M.  
467 Claeson, D. B. Evans, P. Jha, A. Mills, and P. Musgrove, eds, Washington (DC).
- 468 9. Anderson, R., J. Truscott, and T. D. Hollingsworth. 2014. The coverage and frequency of  
469 mass drug administration required to eliminate persistent transmission of soil-transmitted  
470 helminths. *Philos Trans R Soc Lond B Biol Sci* 369: 20130435.
- 471 10. Bethony, J., S. Brooker, M. Albonico, S. M. Geiger, A. Loukas, D. Diemert, and P. J.  
472 Hotez. 2006. Soil-transmitted helminth infections: ascariasis, trichuriasis, and hookworm.  
473 *Lancet* 367: 1521-1532.
- 474 11. Noon, J. B., and R. V. Aroian. 2017. Recombinant subunit vaccines for soil-transmitted  
475 helminths. *Parasitology* 144: 1845-1870.
- 476 12. Camberis, M., G. Le Gros, and J. Urban, Jr. 2003. Animal model of *Nippostrongylus*  
477 *brasiliensis* and *Heligmosomoides polygyrus*. *Curr Protoc Immunol* Chapter 19: Unit 19  
478 12.
- 479 13. Nair, M. G., and D. R. Herbert. 2016. Immune polarization by hookworms: taking cues  
480 from T helper type 2, type 2 innate lymphoid cells and alternatively activated  
481 macrophages. *Immunology* 148: 115-124.
- 482 14. Sutherland, T. E., N. Logan, D. Ruckerl, A. A. Humbles, S. M. Allan, V.  
483 Papayannopoulos, B. Stockinger, R. M. Maizels, and J. E. Allen. 2014. Chitinase-like  
484 proteins promote IL-17-mediated neutrophilia in a tradeoff between nematode killing and  
485 host damage. *Nat Immunol* 15: 1116-1125.

- 486 15. Cardoso, V., J. Chesne, H. Ribeiro, B. Garcia-Cassani, T. Carvalho, T. Bouchery, K.  
487 Shah, N. L. Barbosa-Morais, N. Harris, and H. Veiga-Fernandes. 2017. Neuronal  
488 regulation of type 2 innate lymphoid cells via neuromedin U. *Nature* 549: 277-281.
- 489 16. Inagaki-Ohara, K., Y. Sakamoto, T. Dohi, and A. L. Smith. 2011. gammadelta T cells  
490 play a protective role during infection with *Nippostrongylus brasiliensis* by promoting  
491 goblet cell function in the small intestine. *Immunology* 134: 448-458.
- 492 17. Pflanz, S., J. C. Timans, J. Cheung, R. Rosales, H. Kanzler, J. Gilbert, L. Hibbert, T.  
493 Churakova, M. Travis, E. Vaisberg, W. M. Blumenschein, J. D. Mattson, J. L. Wagner,  
494 W. To, S. Zurawski, T. K. McClanahan, D. M. Gorman, J. F. Bazan, R. de Waal Malefyt,  
495 D. Rennick, and R. A. Kastelein. 2002. IL-27, a heterodimeric cytokine composed of  
496 EB13 and p28 protein, induces proliferation of naive CD4(+) T cells. *Immunity* 16: 779-  
497 790.
- 498 18. Collison, L. W., C. J. Workman, T. T. Kuo, K. Boyd, Y. Wang, K. M. Vignali, R. Cross,  
499 D. Sehy, R. S. Blumberg, and D. A. Vignali. 2007. The inhibitory cytokine IL-35  
500 contributes to regulatory T-cell function. *Nature* 450: 566-569.
- 501 19. Hamano, S., K. Himeno, Y. Miyazaki, K. Ishii, A. Yamanaka, A. Takeda, M. Zhang, H.  
502 Hisaeda, T. W. Mak, A. Yoshimura, and H. Yoshida. 2003. WSX-1 is required for  
503 resistance to *Trypanosoma cruzi* infection by regulation of proinflammatory cytokine  
504 production. *Immunity* 19: 657-667.
- 505 20. Bosmann, M., and P. A. Ward. 2013. Modulation of inflammation by interleukin-27. *J*  
506 *Leukoc Biol* 94: 1159-1165.
- 507 21. Hunter, C. A., and R. Kastelein. 2012. Interleukin-27: balancing protective and  
508 pathological immunity. *Immunity* 37: 960-969.
- 509 22. McHedlidze, T., M. Kindermann, A. T. Neves, D. Voehringer, M. F. Neurath, and S.  
510 Wirtz. 2016. IL-27 suppresses type 2 immune responses in vivo via direct effects on  
511 group 2 innate lymphoid cells. *Mucosal Immunol* 9: 1384-1394.
- 512 23. Artis, D., A. Villarino, M. Silverman, W. He, E. M. Thornton, S. Mu, S. Summer, T. M.  
513 Covey, E. Huang, H. Yoshida, G. Koretzky, M. Goldschmidt, G. D. Wu, F. de Sauvage,  
514 H. R. Miller, C. J. Saris, P. Scott, and C. A. Hunter. 2004. The IL-27 receptor (WSX-1) is  
515 an inhibitor of innate and adaptive elements of type 2 immunity. *J Immunol* 173: 5626-  
516 5634.
- 517 24. Filbey, K., T. Bouchery, and G. Le Gros. 2018. The role of ILC2 in hookworm infection.  
518 *Parasite Immunol* 40.
- 519 25. Fallon, P. G., S. J. Ballantyne, N. E. Mangan, J. L. Barlow, A. Dasvarma, D. R. Hewett,  
520 A. McIlgorm, H. E. Jolin, and A. N. McKenzie. 2006. Identification of an interleukin  
521 (IL)-25-dependent cell population that provides IL-4, IL-5, and IL-13 at the onset of  
522 helminth expulsion. *J Exp Med* 203: 1105-1116.
- 523 26. Moro, K., H. Kabata, M. Tanabe, S. Koga, N. Takeno, M. Mochizuki, K. Fukunaga, K.  
524 Asano, T. Betsuyaku, and S. Koyasu. 2016. Interferon and IL-27 antagonize the function  
525 of group 2 innate lymphoid cells and type 2 innate immune responses. *Nat Immunol* 17:  
526 76-86.
- 527 27. Pennock, N. D., L. Gapin, and R. M. Kedl. 2014. IL-27 is required for shaping the  
528 magnitude, affinity distribution, and memory of T cells responding to subunit  
529 immunization. *Proc Natl Acad Sci U S A* 111: 16472-16477.

- 530 28. Kilgore, A. M., N. D. Pennock, and R. M. Kedl. 2020. cDC1 IL-27p28 Production  
531 Predicts Vaccine-Elicited CD8(+) T Cell Memory and Protective Immunity. *J Immunol*  
532 204: 510-517.
- 533 29. Coffman, R. L., A. Sher, and R. A. Seder. 2010. Vaccine adjuvants: putting innate  
534 immunity to work. *Immunity* 33: 492-503.
- 535 30. Oshiro, I., T. Takenaka, and J. Maeda. 1982. New method for hemoglobin determination  
536 by using sodium lauryl sulfate (SLS). *Clin Biochem* 15: 83-88.
- 537 31. Bosmann, M., N. F. Russkamp, V. R. Patel, F. S. Zetoune, J. V. Sarma, and P. A. Ward.  
538 2011. The outcome of polymicrobial sepsis is independent of T and B cells. *Shock* 36:  
539 396-401.
- 540 32. Batten, M., J. Li, S. Yi, N. M. Kljavin, D. M. Danilenko, S. Lucas, J. Lee, F. J. de  
541 Sauvage, and N. Ghilardi. 2006. Interleukin 27 limits autoimmune encephalomyelitis by  
542 suppressing the development of interleukin 17-producing T cells. *Nature Immunology* 7:  
543 929-936.
- 544 33. Stumhofer, J. S., A. Laurence, E. H. Wilson, E. Huang, C. M. Tato, L. M. Johnson, A. V.  
545 Villarino, Q. Huang, A. Yoshimura, D. Sehy, C. J. Saris, J. J. O'Shea, L. Hennighausen,  
546 M. Ernst, and C. A. Hunter. 2006. Interleukin 27 negatively regulates the development of  
547 interleukin 17-producing T helper cells during chronic inflammation of the central  
548 nervous system. *Nat Immunol* 7: 937-945.
- 549 34. Stumhofer, J. S., J. S. Silver, A. Laurence, P. M. Porrett, T. H. Harris, L. A. Turka, M.  
550 Ernst, C. J. Saris, J. J. O'Shea, and C. A. Hunter. 2007. Interleukins 27 and 6 induce  
551 STAT3-mediated T cell production of interleukin 10. *Nat Immunol* 8: 1363-1371.
- 552 35. Schmidt-Wolf, I. G., R. S. Negrin, H. P. Kiem, K. G. Blume, and I. L. Weissman. 1991.  
553 Use of a SCID mouse/human lymphoma model to evaluate cytokine-induced killer cells  
554 with potent antitumor cell activity. *J Exp Med* 174: 139-149.
- 555 36. Meresse, B., Z. Chen, C. Ciszewski, M. Tretiakova, G. Bhagat, T. N. Krausz, D. H.  
556 Raulet, L. L. Lanier, V. Groh, T. Spies, E. C. Ebert, P. H. Green, and B. Jabri. 2004.  
557 Coordinated induction by IL15 of a TCR-independent NKG2D signaling pathway  
558 converts CTL into lymphokine-activated killer cells in celiac disease. *Immunity* 21: 357-  
559 366.
- 560 37. Avanzi, G. C., A. Cessano, M. F. Brizzi, S. C. Clark, L. Pegoraro, and L. Matera. 1989.  
561 Biological and molecular evidence for the production of IL-6 by human natural killer  
562 cells in culture. *Life Sci* 45: 2621-2626.
- 563 38. Kuhn, K. A., N. A. Manieri, T. C. Liu, and T. S. Stappenbeck. 2014. IL-6 stimulates  
564 intestinal epithelial proliferation and repair after injury. *PLoS One* 9: e114195.
- 565 39. Saito, F., S. Tasaka, K. Inoue, K. Miyamoto, Y. Nakano, Y. Ogawa, W. Yamada, Y.  
566 Shiraishi, N. Hasegawa, S. Fujishima, H. Takano, and A. Ishizaka. 2008. Role of  
567 interleukin-6 in bleomycin-induced lung inflammatory changes in mice. *Am J Respir Cell*  
568 *Mol Biol* 38: 566-571.
- 569 40. Bhargava, R., W. Janssen, C. Altmann, A. Andres-Hernando, K. Okamura, R. W.  
570 Vandivier, N. Ahuja, and S. Faubel. 2013. Intratracheal IL-6 protects against lung  
571 inflammation in direct, but not indirect, causes of acute lung injury in mice. *PLoS One* 8:  
572 e61405.
- 573 41. Sozzani, S., D. Zhou, M. Locati, M. Rieppi, P. Proost, M. Magazin, N. Vita, J. van  
574 Damme, and A. Mantovani. 1994. Receptors and transduction pathways for monocyte



- 575 chemotactic protein-2 and monocyte chemotactic protein-3. Similarities and differences  
576 with MCP-1. *J Immunol* 152: 3615-3622.
- 577 42. Franci, C., L. M. Wong, J. Van Damme, P. Proost, and I. F. Charo. 1995. Monocyte  
578 chemoattractant protein-3, but not monocyte chemoattractant protein-2, is a functional  
579 ligand of the human monocyte chemoattractant protein-1 receptor. *J Immunol* 154: 6511-  
580 6517.
- 581 43. McKenzie, D. R., E. E. Kara, C. R. Bastow, T. S. Tyllis, K. A. Fenix, C. E. Gregor, J. J.  
582 Wilson, R. Babb, J. C. Paton, A. Kallies, S. L. Nutt, A. Brustle, M. Mack, I. Comerford,  
583 and S. R. McColl. 2017. IL-17-producing gammadelta T cells switch migratory patterns  
584 between resting and activated states. *Nat Commun* 8: 15632.
- 585 44. McLoughlin, R. M., B. J. Jenkins, D. Grail, A. S. Williams, C. A. Fielding, C. R. Parker,  
586 M. Ernst, N. Topley, and S. A. Jones. 2005. IL-6 trans-signaling via STAT3 directs T cell  
587 infiltration in acute inflammation. *Proc Natl Acad Sci U S A* 102: 9589-9594.
- 588 45. Barbi, J., S. Oghumu, C. M. Lezama-Davila, and A. R. Satoskar. 2007. IFN-gamma and  
589 STAT1 are required for efficient induction of CXC chemokine receptor 3 (CXCR3) on  
590 CD4+ but not CD8+ T cells. *Blood* 110: 2215-2216.
- 591 46. Bosmann, M., N. F. Russkamp, B. Strobl, J. Roewe, L. Balouzian, F. Pache, M. P.  
592 Radsak, N. van Rooijen, F. S. Zetoune, J. V. Sarma, G. Nunez, M. Muller, P. J. Murray,  
593 and P. A. Ward. 2014. Interruption of macrophage-derived IL-27(p28) production by IL-  
594 10 during sepsis requires STAT3 but not SOCS3. *J Immunol* 193: 5668-5677.
- 595 47. Vijayan, D., N. Mohd Redzwan, D. T. Avery, R. C. Wirasinha, R. Brink, G. Walters, S.  
596 Adelstein, M. Kobayashi, P. Gray, M. Elliott, M. Wong, C. King, C. G. Vinuesa, N.  
597 Ghilardi, C. S. Ma, S. G. Tangye, and M. Batten. 2016. IL-27 Directly Enhances  
598 Germinal Center B Cell Activity and Potentiates Lupus in Sanroque Mice. *J Immunol*  
599 197: 3008-3017.
- 600 48. Pflanz, S., L. Hibbert, J. Mattson, R. Rosales, E. Vaisberg, J. F. Bazan, J. H. Phillips, T.  
601 K. McClanahan, R. de Waal Malefyt, and R. A. Kastelein. 2004. WSX-1 and  
602 glycoprotein 130 constitute a signal-transducing receptor for IL-27. *J Immunol* 172:  
603 2225-2231.
- 604 49. Kalliolias, G. D., and L. B. Ivashkiv. 2008. IL-27 activates human monocytes via STAT1  
605 and suppresses IL-10 production but the inflammatory functions of IL-27 are abrogated  
606 by TLRs and p38. *J Immunol* 180: 6325-6333.
- 607 50. Holscher, C., A. Holscher, D. Ruckerl, T. Yoshimoto, H. Yoshida, T. Mak, C. Saris, and  
608 S. Ehlers. 2005. The IL-27 receptor chain WSX-1 differentially regulates antibacterial  
609 immunity and survival during experimental tuberculosis. *J Immunol* 174: 3534-3544.
- 610 51. Zhao, X., S. M. Ting, C. H. Liu, G. Sun, M. Kruzel, M. Roy-O'Reilly, and J. Aronowski.  
611 2017. Neutrophil polarization by IL-27 as a therapeutic target for intracerebral  
612 hemorrhage. *Nat Commun* 8: 602.
- 613 52. Seita, J., M. Asakawa, J. Oeohara, S. Takayanagi, Y. Morita, N. Watanabe, K. Fujita, M.  
614 Kudo, J. Mizuguchi, H. Ema, H. Nakauchi, and T. Yoshimoto. 2008. Interleukin-27  
615 directly induces differentiation in hematopoietic stem cells. *Blood* 111: 1903-1912.
- 616 53. Li, J. P., H. Wu, W. Xing, S. G. Yang, S. H. Lu, W. T. Du, J. X. Yu, F. Chen, L. Zhang,  
617 and Z. C. Han. 2010. Interleukin-27 as a negative regulator of human neutrophil function.  
618 *Scand J Immunol* 72: 284-292.

- 619 54. Ruckerl, D., M. Hessmann, T. Yoshimoto, S. Ehlers, and C. Holscher. 2006.  
620 Alternatively activated macrophages express the IL-27 receptor alpha chain WSX-1.  
621 *Immunobiology* 211: 427-436.
- 622 55. Villarino, A. V., D. Artis, J. S. Bezbradica, O. Miller, C. J. Saris, S. Joyce, and C. A.  
623 Hunter. 2008. IL-27R deficiency delays the onset of colitis and protects from helminth-  
624 induced pathology in a model of chronic IBD. *Int Immunol* 20: 739-752.
- 625 56. Anuradha, R., S. Munisankar, Y. Bhootra, J. Jagannathan, C. Dolla, P. Kumaran, K.  
626 Shen, T. B. Nutman, and S. Babu. 2016. Systemic Cytokine Profiles in Strongyloides  
627 stercoralis Infection and Alterations following Treatment. *Infect Immun* 84: 425-431.
- 628 57. Anuradha, R., S. Munisankar, Y. Bhootra, C. Dolla, P. Kumaran, T. B. Nutman, and S.  
629 Babu. 2017. Modulation of CD4(+) and CD8(+) T Cell Function and Cytokine Responses  
630 in Strongyloides stercoralis Infection by Interleukin-27 (IL-27) and IL-37. *Infect Immun*  
631 85.
- 632 58. Hegewald, J., R. G. Gantin, C. J. Lechner, X. Huang, A. Agosssou, Y. F. Agbeko, P. T.  
633 Soboslay, and C. Kohler. 2015. Cellular cytokine and chemokine responses to parasite  
634 antigens and fungus and mite allergens in children co-infected with helminthes and  
635 protozoa parasites. *J Inflamm (Lond)* 12: 5.
- 636 59. Perrigoue, J. G., F. A. Marshall, and D. Artis. 2008. On the hunt for helminths: innate  
637 immune cells in the recognition and response to helminth parasites. *Cell Microbiol* 10:  
638 1757-1764.
- 639 60. McGuinness, D. H., P. K. Dehal, and R. J. Pleass. 2003. Pattern recognition molecules  
640 and innate immunity to parasites. *Trends Parasitol* 19: 312-319.
- 641 61. Bosmann, M., M. D. Haggadone, M. R. Hemmila, F. S. Zetoune, J. V. Sarma, and P. A.  
642 Ward. 2012. Complement activation product C5a is a selective suppressor of TLR4-  
643 induced, but not TLR3-induced, production of IL-27(p28) from macrophages. *J Immunol*  
644 188: 5086-5093.
- 645 62. Bosmann, M., B. Strobl, N. Kichler, D. Rigler, J. J. Grailer, F. Pache, P. J. Murray, M.  
646 Muller, and P. A. Ward. 2014. Tyrosine kinase 2 promotes sepsis-associated lethality by  
647 facilitating production of interleukin-27. *J Leukoc Biol* 96: 123-131.
- 648 63. Schwacha, M. G., M. Rani, S. E. Nicholson, A. M. Lewis, T. L. Holloway, S. Sordo, and  
649 A. P. Cap. 2016. Dermal gammadelta T-Cells Can Be Activated by Mitochondrial  
650 Damage-Associated Molecular Patterns. *PLoS One* 11: e0158993.
- 651 64. Szabo, P. A., M. Miron, and D. L. Farber. 2019. Location, location, location: Tissue  
652 resident memory T cells in mice and humans. *Sci Immunol* 4.

653

654

655

656 **Figure Legends**

657

658 **FIGURE 1.** IL-27(p28) is transiently present in the lung alveolar space at day 1 post-inoculation  
659 with *N. brasiliensis* larvae.

660 Wild type mice (C57BL/6J) were inoculated s.c. with L3 larvae (n=500/mouse) of *N. brasiliensis*.  
661 IL-27(p28) was quantified in broncho-alveolar lavage fluids (BALF) by ELISA at the indicated  
662 time points (days 0, 1, 2 and 9). Comparisons of mean  $\pm$  SEM and each circle represents an  
663 individual animal. PBS: mock inoculated/uninfected/day 0 post-inoculation. \*  $P<0.05$ , \*\*\*\*  
664  $P<0.0001$ , ns: not significant.

665

666 **FIGURE 2.** *N. brasiliensis* infection promotes the appearance of IL-27RA expressing  
667 lymphocytes in the lungs. C57BL/6J wild type mice were infected s.c. with L3 larvae  
668 (n=500/mouse) or received a mock PBS injection as controls. The inflammatory cells were  
669 collected by BAL at indicated time points and analyzed by flow cytometry.

670 **(A)** Plots of CD19 versus CD3 pre-gated on CD45<sup>+</sup>Ly6G<sup>-</sup> single cell lymphocytes (left panel) and  
671 NK1.1 versus CD3 gated on CD19<sup>-</sup>CD3<sup>-</sup> innate lymphocytes (right panel) at 2 days after infection.  
672 Percentages are indicated next to each gate. **(B)** Absolute numbers of lymphocyte populations in  
673 BAL of CD19<sup>-</sup>CD3<sup>+</sup> T cells, CD19<sup>+</sup>CD3<sup>-</sup> B cells and CD19<sup>-</sup>CD3<sup>-</sup>NK1.1<sup>+</sup> NK cells on day 0 (PBS-  
674 inoculated/uninfected), day 1 and day 2 post-inoculation (n=3 mice/group). **(C)** Representative  
675 histograms of IL-27RA expression on CD19<sup>-</sup>CD3<sup>+</sup> T cells. (left panel), CD19<sup>-</sup>CD3<sup>-</sup>NK1.1<sup>+</sup> NK  
676 cells (middle panel) and CD19<sup>+</sup>CD3<sup>-</sup> B cells (right panel) on day 2 p.i. The dotted black line  
677 indicates isotype-FMO control. The percentages of IL-27RA<sup>-</sup> and IL-27RA<sup>+</sup> cells are indicated in  
678 the upper left and right corners, respectively. **(D)** Frequencies (%) of IL-27RA<sup>+</sup>CD19<sup>-</sup>CD3<sup>+</sup> T

679 cells, CD19<sup>-</sup>CD3<sup>-</sup>NK1.1<sup>+</sup> NK cells and CD19<sup>+</sup>CD3<sup>-</sup> B cells in BAL on day 1 (n=2 mice/group)  
680 and day 2 (n=3 mice/group) post-inoculation. (E) IL-27RA presence expressed as geometric mean  
681 fluorescence intensities (gMFI) on CD19<sup>-</sup>CD3<sup>+</sup> T cells, CD19<sup>-</sup>CD3<sup>-</sup>NK1.1<sup>+</sup> NK cells and  
682 CD19<sup>+</sup>CD3<sup>-</sup> B cells (all left panel) from the same experiments described in frame D. A  
683 representative histogram of IL-27RA expression on CD19<sup>-</sup>CD3<sup>+</sup> T cells is shown in the right panel  
684 with the dotted and solid red lines indicating days 1 and 2 p.i., respectively. The dotted black line  
685 indicates isotype-FMO control (Ctrl). Data (B, D, E) are shown as mean ± SEM and were analyzed  
686 by two-tailed t-test (B) comparing day 0 vs. day 1 and day 0 vs. day 2 for each cell type, or two-  
687 way ANOVA (D, E), \*  $P < 0.05$ , \*\*  $P < 0.01$ , \*\*\*  $P < 0.001$ , \*\*\*\*  $P < 0.0001$ , ns: not significant.

688

689 **FIGURE 3.** IL-27RA expression is highest on  $\gamma\delta$  T cells among broncho-alveolar lymphocytes  
690 during *N. brasiliensis* infection.

691 (A) Flow cytometry plots of TCR $\beta$  chain versus TCR $\gamma\delta$  pre-gated on CD3<sup>+</sup> single cell lymphocytes  
692 (left panel) and CD4 versus CD8a on  $\alpha\beta$  T cells (right panel) in BAL after 2 days of infection with  
693 L3 larvae of *N. brasiliensis* (n=500 per C57BL/6/J mouse s.c.). The frequencies (%) of cells are  
694 indicated next to each gate. (B) Absolute numbers in BAL of CD4<sup>+</sup>CD8<sup>-</sup> T helper (Th) cells, CD4<sup>-</sup>  
695 CD8<sup>+</sup> cytotoxic T lymphocytes (CTLs) and TCR $\beta$ <sup>-</sup>TCR $\gamma\delta$ <sup>+</sup>  $\gamma\delta$  T cells on day 0 (PBS-  
696 inoculated/uninfected), day 1 (n=2 mice/group) and day 2 post-inoculation (n=6 mice/group). (C)  
697 Representative histograms of IL-27RA expression on TCR $\beta$ <sup>-</sup>TCR $\gamma\delta$ <sup>+</sup>  $\gamma\delta$  T cells (left panel), CD4<sup>-</sup>  
698 CD8<sup>+</sup> CTLs (middle panel) and CD4<sup>+</sup>CD8<sup>-</sup> Th cells (right panel). The dotted line indicates IL-  
699 27RA staining in *Il27ra*<sup>-/-</sup> mice as negative control. The percentages of IL-27RA<sup>-</sup> and IL-27RA<sup>+</sup>  
700 cells are indicated in the upper left and right corners, respectively. (D) Relative numbers of IL-  
701 27RA-positive TCR $\beta$ <sup>-</sup>TCR $\gamma\delta$ <sup>+</sup>  $\gamma\delta$  T cells, CD4<sup>-</sup>CD8<sup>+</sup> CTLs and CD4<sup>+</sup>CD8<sup>-</sup> Th cells in BAL on day

702 2 p.i. (n=6 mice/group). **(E)** IL-27RA abundance (gMFI) on TCR $\beta$ <sup>-</sup>TCR $\gamma\delta$ <sup>+</sup>  $\gamma\delta$  T cells, CD4<sup>-</sup>CD8<sup>+</sup>  
703 CTLs and CD4<sup>+</sup>CD8<sup>-</sup> Th cells in BAL on day 2 p.i. (n=6 mice/group). Data (B, D, E) are shown  
704 as mean  $\pm$  SEM and were analyzed by two-tailed t-test (B) comparing day 0 vs. day 1 and day 0  
705 vs. day 2 for each cell type, or one-way ANOVA (D, E), \*  $P < 0.05$ , \*\*  $P < 0.01$ , \*\*\*  $P < 0.001$ , \*\*\*\*  
706  $P < 0.0001$ , ns: not significant.

707

708 **FIGURE 4.** IL-27 enhances innate resistance to primary *N. brasiliensis* infection in the lungs.

709 **(A-C)** *In vivo* comparison of susceptibility of Il27ra<sup>-/-</sup> mice and wild type (WT; C57BL/6NJ) mice  
710 to primary *N. brasiliensis* infection (L3 n=500/mouse) in the lungs at 2 days after infection. **(A)**  
711 Alveolar parasite burden, **(B)** alveolar hemorrhage, and **(C)** alveolar total protein in BALF. **(D-F)**  
712 *In vivo* comparison of susceptibility of WT mice (C57BL/6J) administered with rmIL-27 (100  
713 ng/mouse i.p., once daily on days 0-1) or mock control (0.1% BSA in PBS) during *N. brasiliensis*  
714 infection and analyzed after 2 days p.i. **(D)** Comparison of alveolar parasite burden, **(E)** alveolar  
715 hemorrhage, and **(F)** alveolar total protein in BALF. Data (A-F) are shown as mean  $\pm$  SEM and  
716 each circle indicates an individual mouse, \*  $P < 0.05$ , \*\*  $P < 0.01$ , ns: not significant.

717

718 **FIGURE 5.** IL-27 regulates inflammatory mediators during primary pulmonary *N. brasiliensis*  
719 infection.

720 **(A)** *In vivo* comparison of selected cytokines and chemokines of Il27ra<sup>-/-</sup> mice and wild type  
721 control (C57BL/6NJ) mice to primary *N. brasiliensis* infection (L3 n=500/mouse) in the lungs  
722 (BALF) at 2 days after infection. **(B)** C57BL/6J mice administered with rmIL-27 (100 ng/mouse  
723 i.p., once daily on day 0 and day 1) or mock control (0.1% BSA in PBS) during *N. brasiliensis*  
724 infection and analyzed for the presence of inflammatory mediators after 2 days p.i in BALF. All

725 data were obtained by multiplexed bead-based assay (Luminex-200). Graphs (A-B) are presented  
726 as mean  $\pm$  SEM, were analyzed by two-tailed t-test and each circle indicates an individual mouse,  
727 \*  $P < 0.05$ , \*\*  $P < 0.01$ .

728

729 **FIGURE 6.** Il27ra<sup>-/-</sup> mice have decreased presence of  $\gamma\delta$  T cells in the alveolar space during *N.*  
730 *brasiliensis* infection.

731 (A) Representative flow cytometry plots of TCR $\beta$ <sup>-</sup>TCR $\gamma\delta$ <sup>+</sup>  $\gamma\delta$  T cells (top panel), and CD4<sup>+</sup>CD8<sup>-</sup>  
732 Th cells and CD4<sup>-</sup>CD8<sup>+</sup> CTLs (bottom panel), gated as in Fig. 3A, for WT (left panel) and Il27ra<sup>-/-</sup>  
733 mice (right panel) in BAL on day 2 p.i. Percentages are indicated next to each gate. (B, C)  
734 Comparisons of frequencies (B) and absolute numbers (C) of CD4<sup>+</sup>CD8<sup>-</sup> Th cells, CD4<sup>-</sup>CD8<sup>+</sup>  
735 CTLs and TCR $\beta$ <sup>-</sup>TCR $\gamma\delta$ <sup>+</sup>  $\gamma\delta$  T cells in BAL of WT mice (n=5 mice/group; one mouse was removed  
736 due to extremely low infection, as determined by negligible hemorrhage) and Il27ra<sup>-/-</sup> mice on day  
737 2 p.i. (n=6 mice/group). Data (B, C) are shown as mean  $\pm$  SEM, were analyzed by two-tailed t-test  
738 (WT vs. Il27ra<sup>-/-</sup>) and each symbol represents the value of an individual mouse, \*  $P < 0.05$ , ns: not  
739 significant.

740

741 **FIGURE S1.** IL-27RA is not expressed on alveolar macrophages, neutrophils or eosinophils from  
742 the alveolar space during *N. brasiliensis* infection.

743 (A) Flow cytometry plots including gating strategy of CD45 versus Ly6G pre-gated on single  
744 myeloid cells (left) and CD11c versus Siglec-F on Ly6G<sup>-</sup> myeloid cells (right). Percentages are  
745 indicated next to each gate. (B) Numbers of Ly6G<sup>+</sup> neutrophils, Ly6G<sup>-</sup>CD11c<sup>+</sup>Siglec-F<sup>+</sup> alveolar  
746 macrophages and Ly6G<sup>-</sup>CD11c<sup>-</sup>Siglec-F<sup>+</sup> eosinophils on day 0 (PBS-inoculated/uninfected), day  
747 1 and day 2 post-inoculation (n=3 mice/group) in BAL; day 0 vs. day 1 and day 0 vs. day 2 using  
748 two-tailed t-test, data shows mean  $\pm$  SEM. (C) Histograms of IL-27RA expression on Ly6G<sup>-</sup>

749 CD11c<sup>+</sup>Siglec-F<sup>+</sup> alveolar macrophages (left), Ly6G<sup>+</sup> neutrophils (middle) and Ly6G<sup>-</sup>CD11c<sup>-</sup>  
750 Siglec-F<sup>+</sup> eosinophils (right) on day 2 p.i. The dotted line indicates isotype-FMO control. The  
751 percentages of IL-27RA<sup>-</sup> and IL-27RA<sup>+</sup> cells are indicated in the upper left and right corners,  
752 respectively.

753

754 **FIGURE S2.** Parasite burdens are similar between wild type mice compared to Il27ra<sup>-/-</sup> mice in  
755 the lung tissues during *N. brasiliensis* infection.

756 Wild type mice (C57BL/6NJ) and Il27ra<sup>-/-</sup> mice were inoculated s.c. with L3 larvae  
757 (n=500/mouse). Parasite numbers were counted in whole lung tissues after removal of intra-airway  
758 parasites by multiple BAL on day 2 of infection. Lungs were minced from the same experiments  
759 as shown in Fig. 4A. Comparison of mean ± SEM analyzed by two-tailed t-test and each circle  
760 indicates the value of an individual mouse, ns: not significant.

761

762 **FIGURE S3.** Cytokines and chemokines in brochoalveolar lavage fluids of Il27ra<sup>-/-</sup> mice.

763 *In vivo* comparison of different cytokines and chemokines of Il27ra<sup>-/-</sup> mice and wild type (WT;  
764 C57BL/6NJ) mice during primary *N. brasiliensis* infection (L3 n=500/mouse) in BALF after 2  
765 days, bead-based multiplex assay. Data are shown as mean ± SEM and each circle represents an  
766 individual mouse, two-tailed t-test, \*  $P < 0.05$ , \*\*  $P < 0.01$ .

767

768 **FIGURE S4.** Cytokines and chemokines in brochoalveolar lavage fluids after treatment with  
769 recombinant mouse IL-27.

770 *In vivo* comparison of mediators in BALF from WT mice (C57BL/6J) administered with rmIL-27  
771 (100 ng/mouse i.p.) or mock control (0.1% BSA in PBS) on day 0 and day 1 of *N. brasiliensis*

772 infection and analyzed after 2 days p.i. Data are shown as mean  $\pm$  SEM and each circle indicates  
773 an individual mouse, two-tailed t-test, \*  $P < 0.05$ .



Figure 1

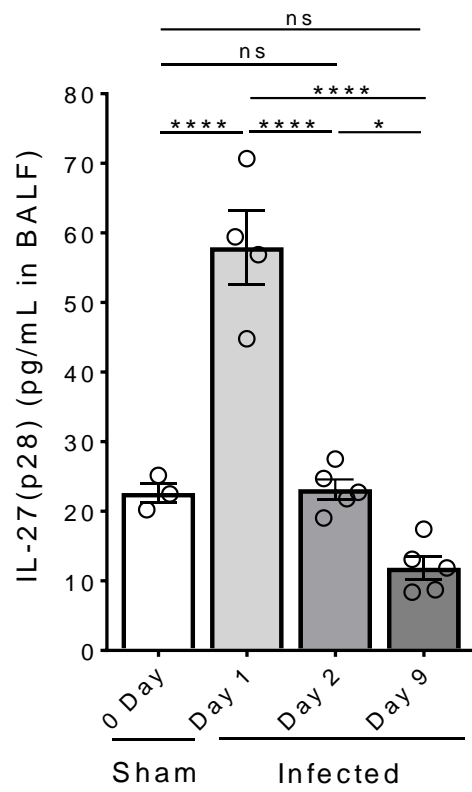

Figure 2

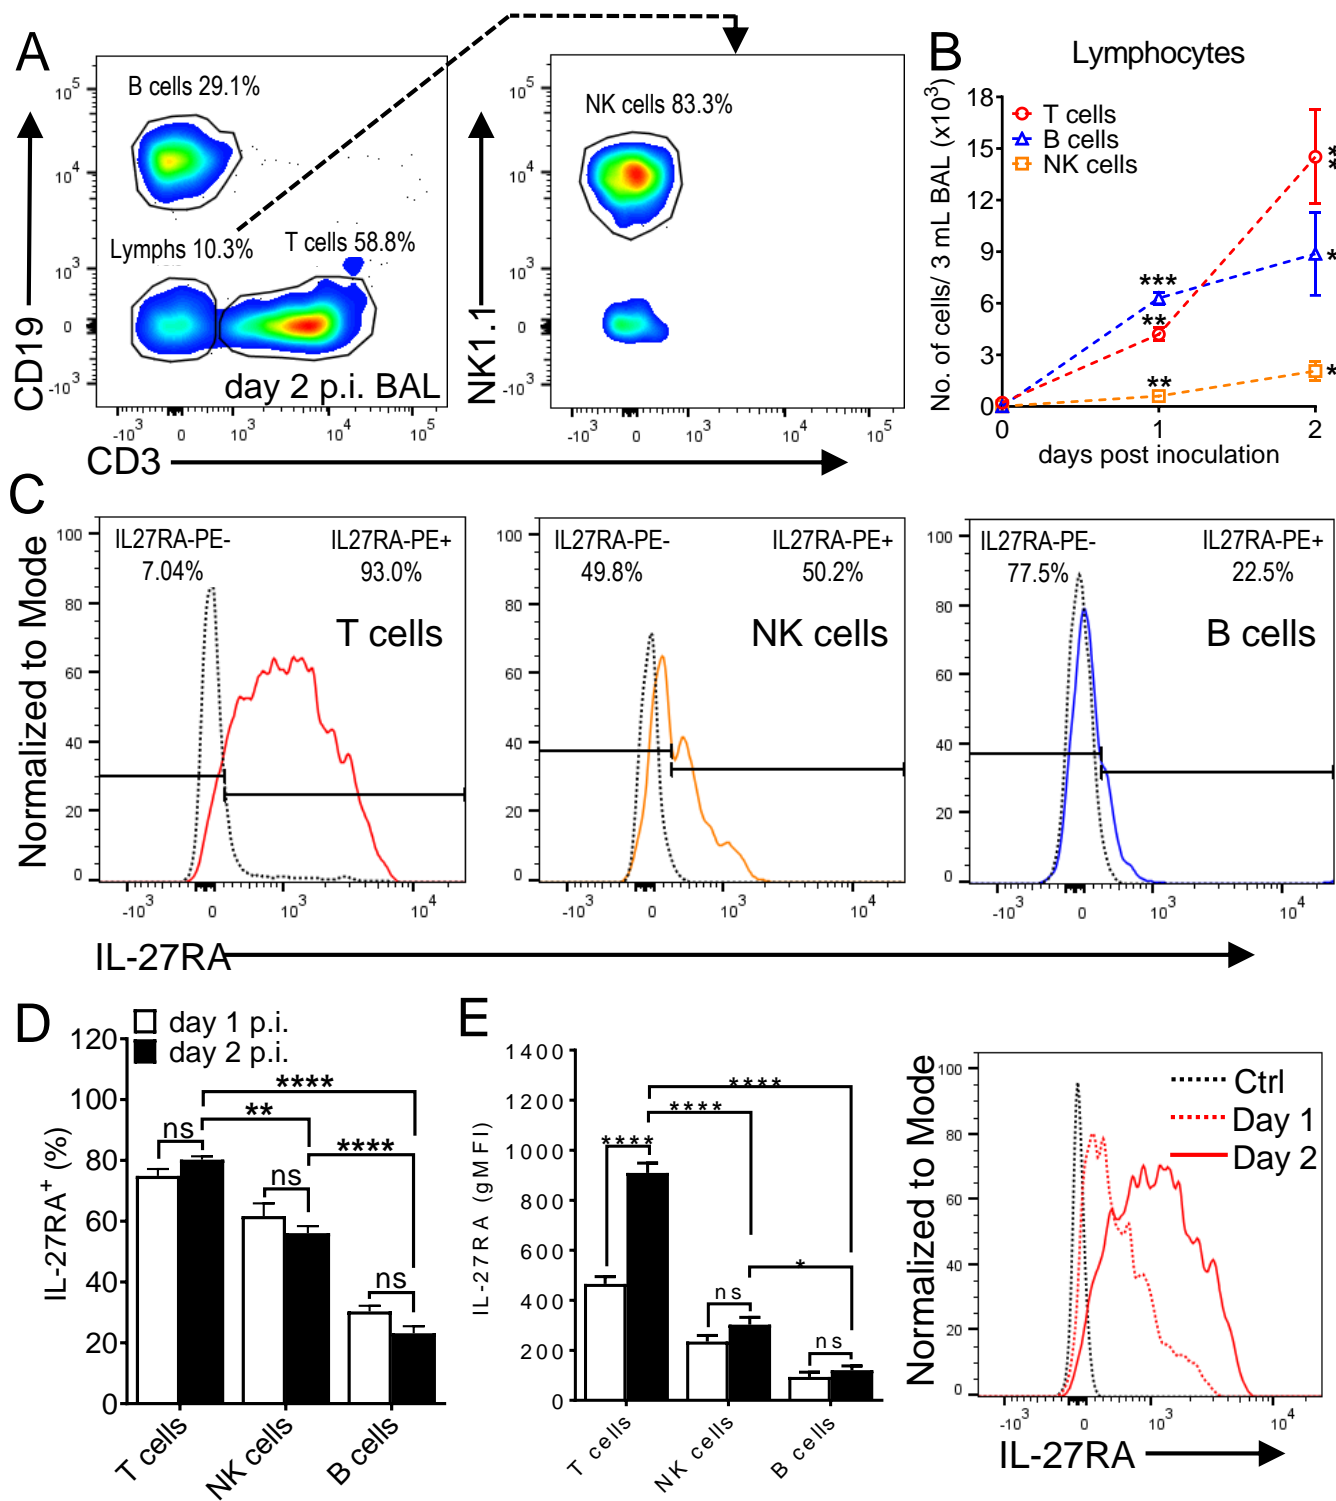

Figure 3

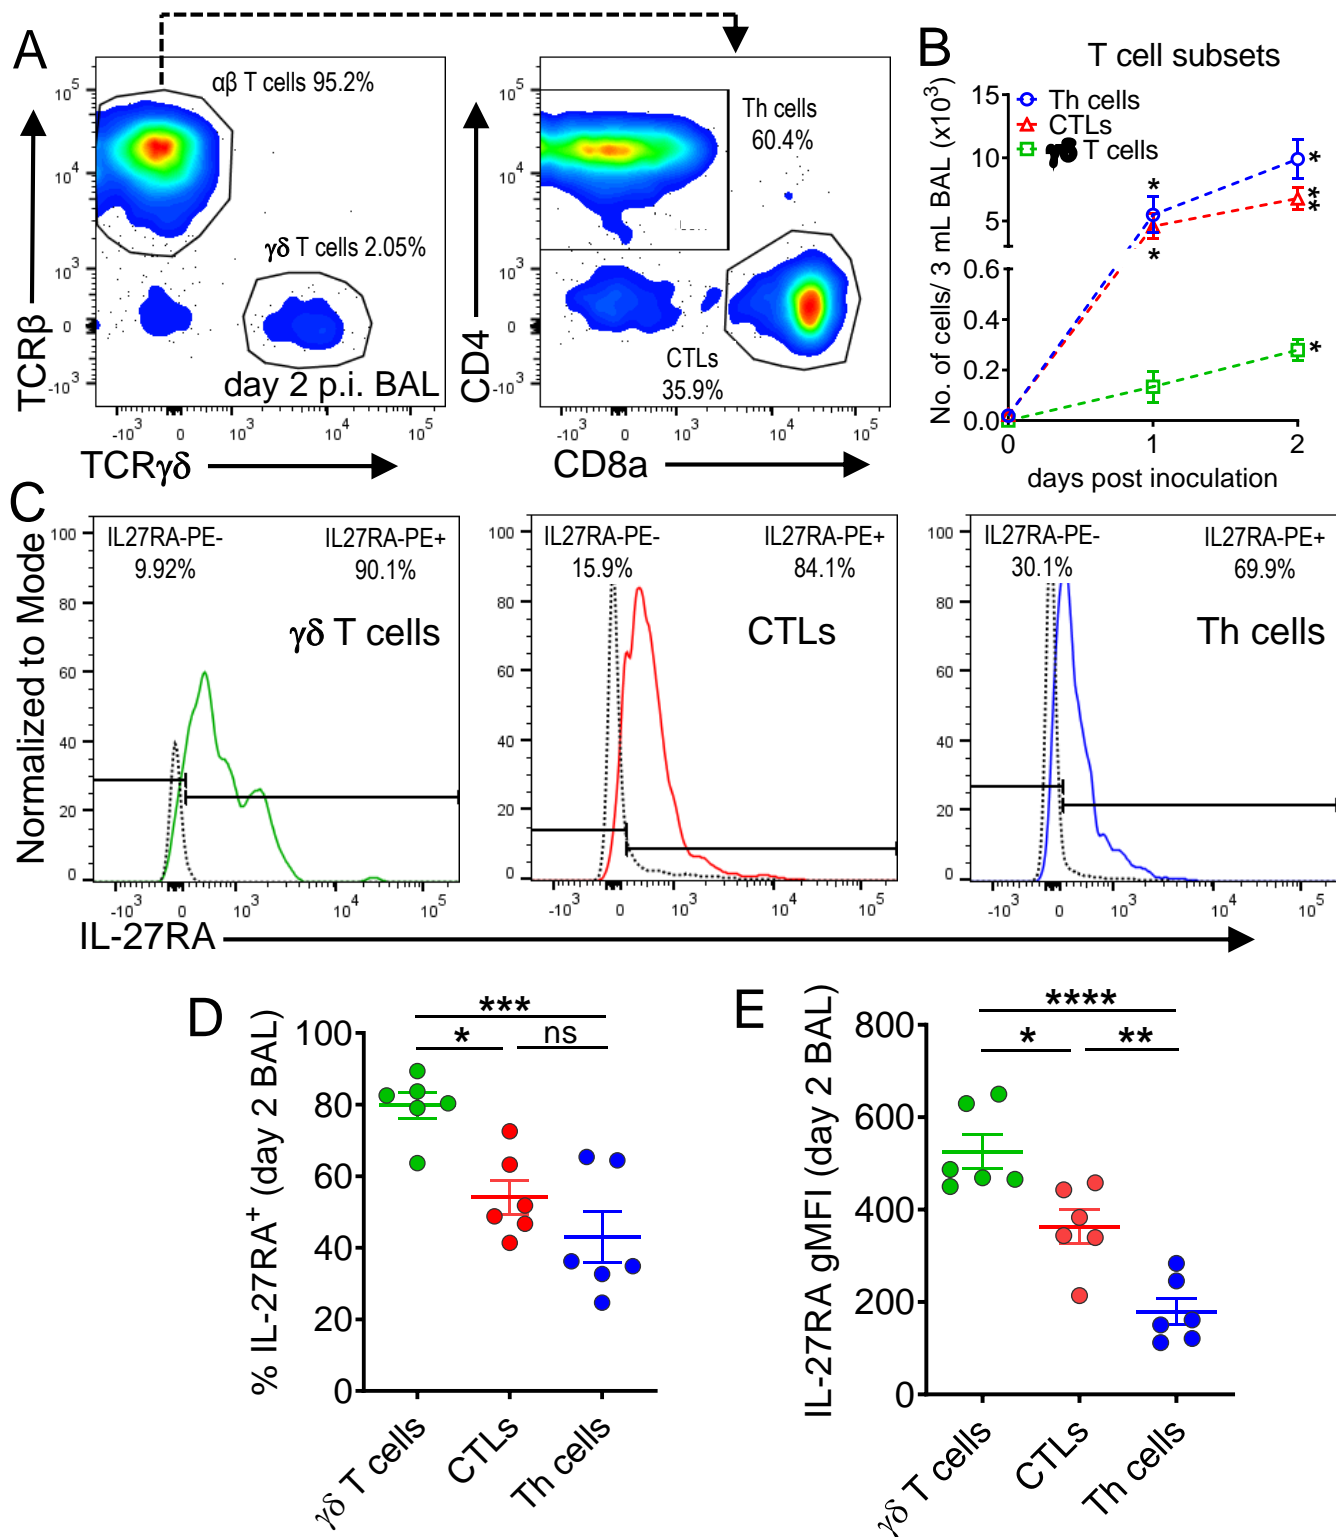

Figure 4

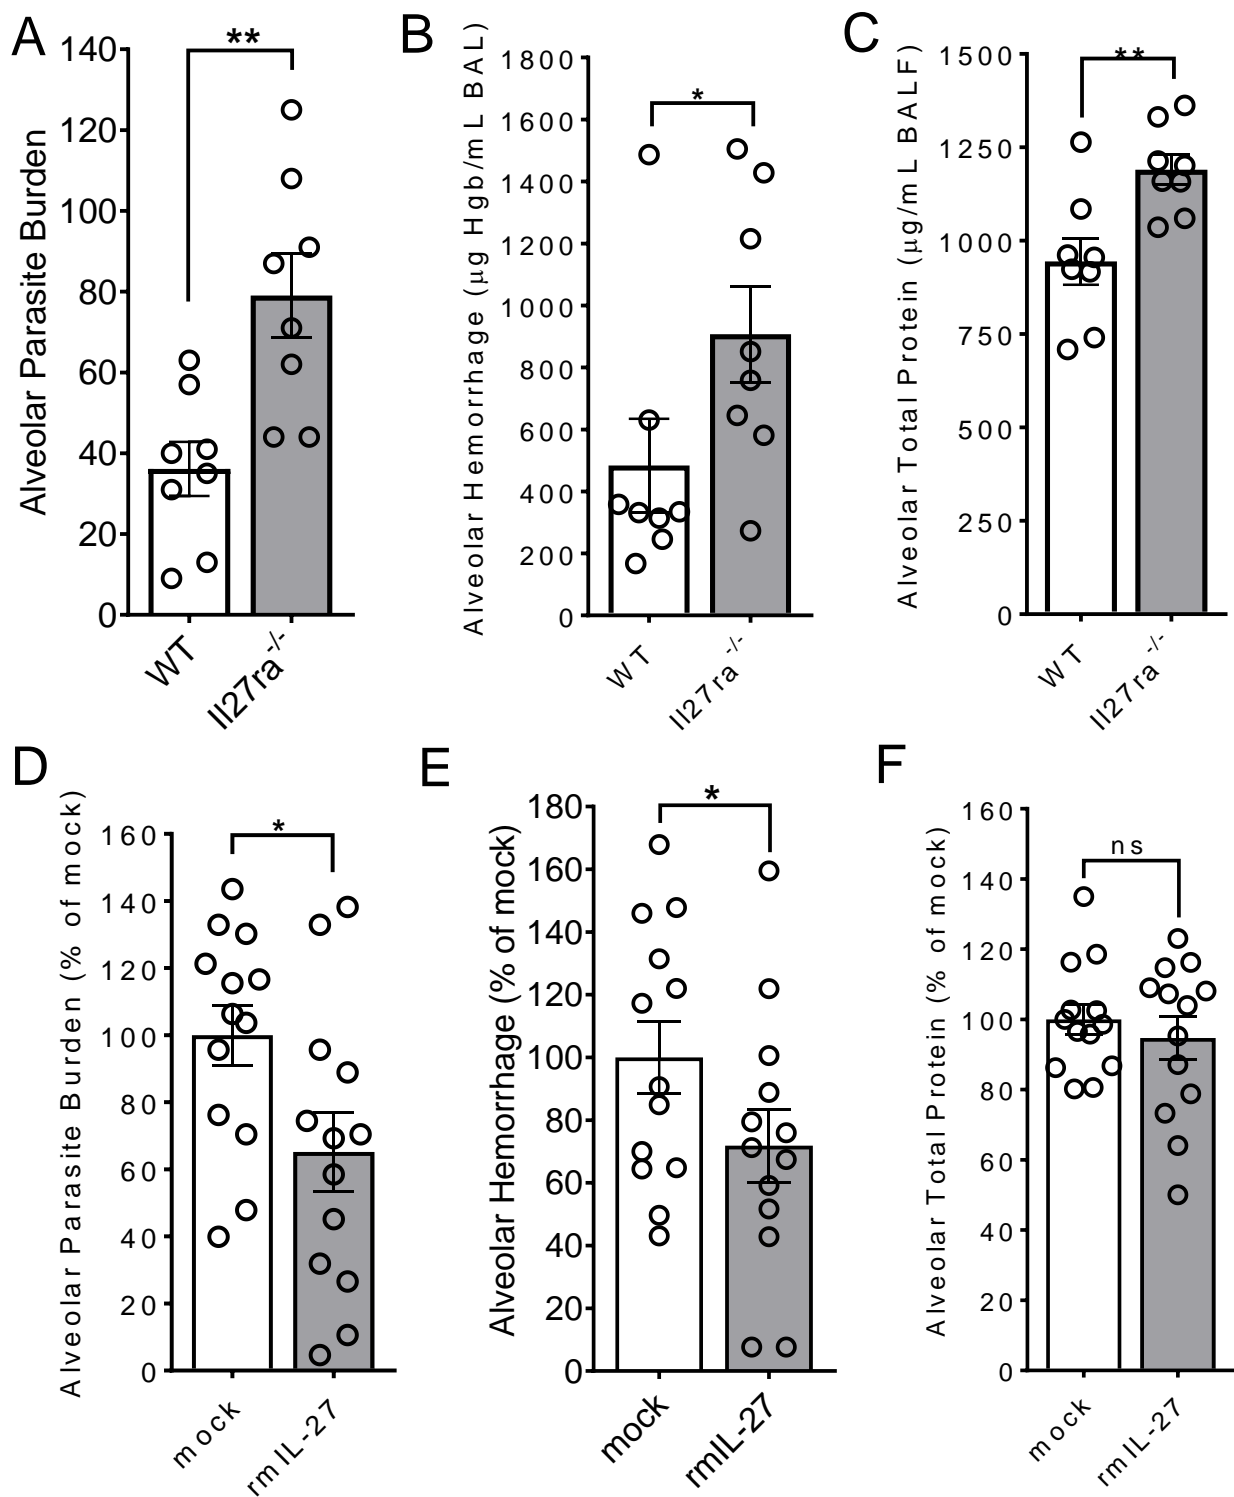

Figure 5

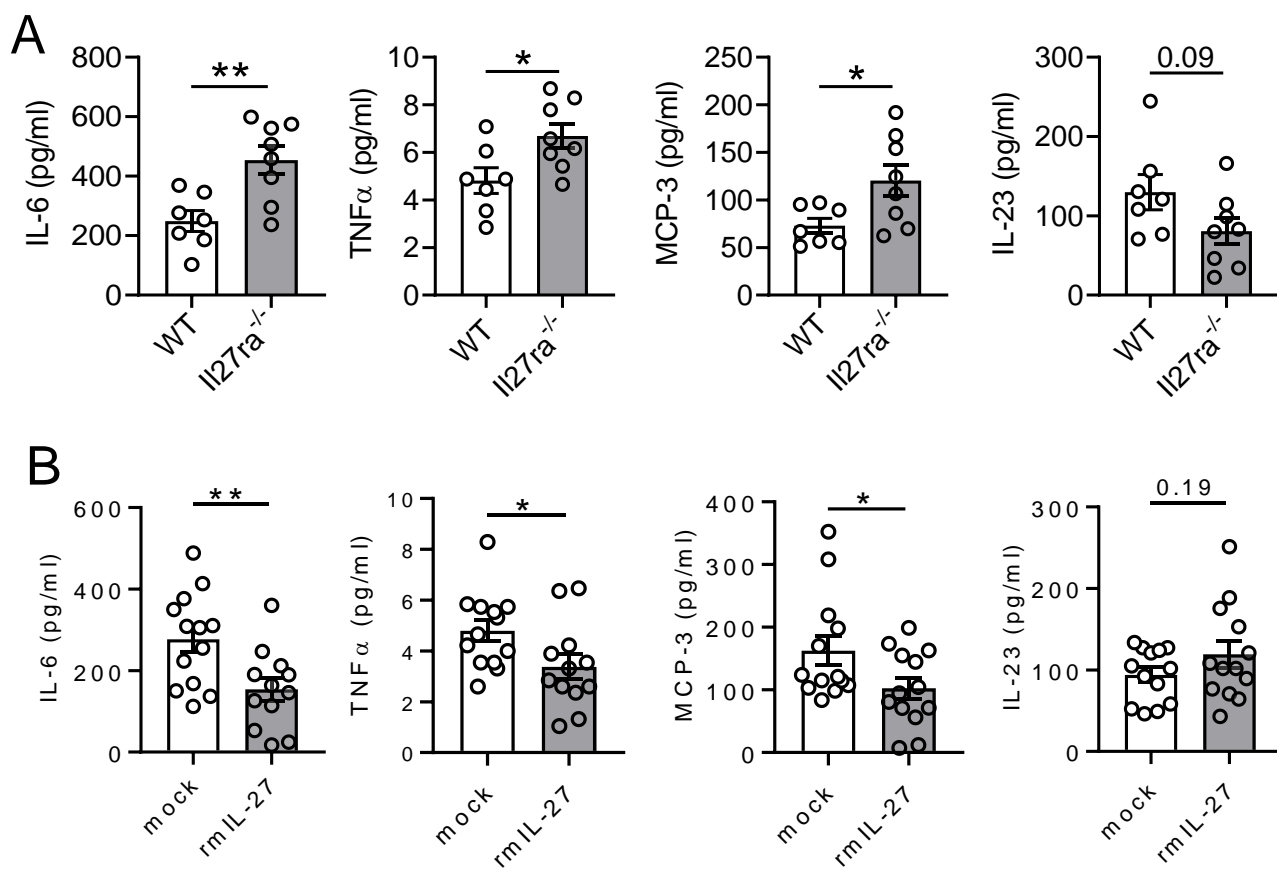

Figure 6

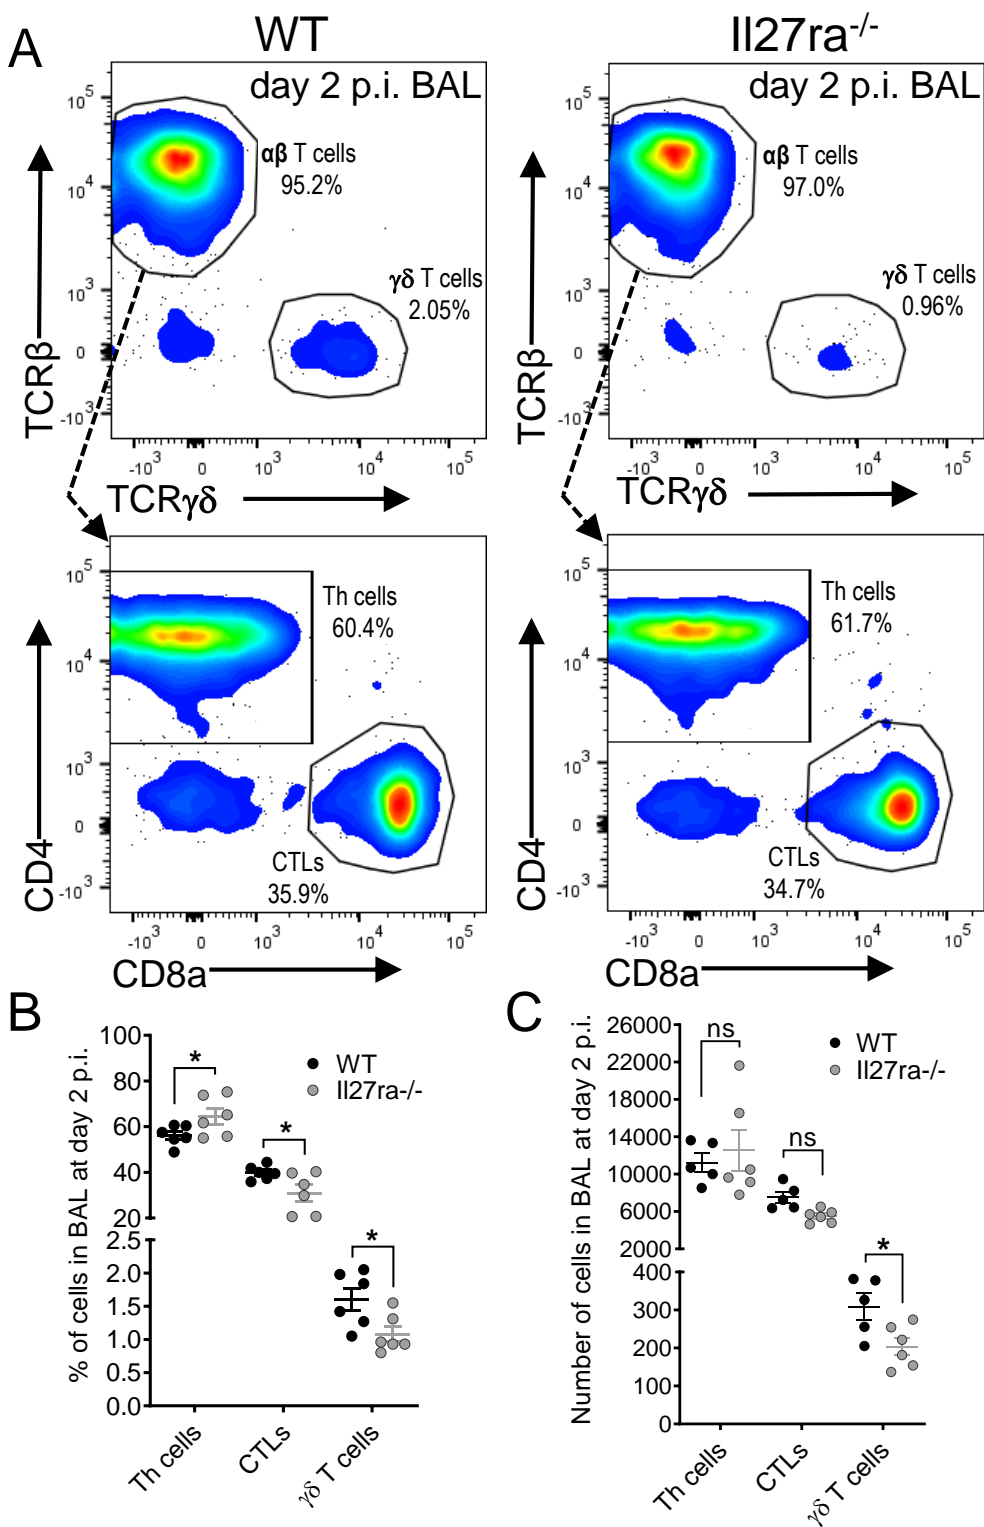

## Supplemental Data

### **IL-27 enhances the lymphocyte mediated innate resistance to primary hookworm infection in the lungs**

Jason B. Noon<sup>§,\*</sup>, Arjun Sharma<sup>§,†,\*</sup>, Johannes Platten<sup>†</sup>, Lee J. Quinton<sup>§</sup>, Christoph Reinhardt<sup>†</sup>, and Markus Bosmann<sup>§,†,‡</sup>

<sup>§</sup>Pulmonary Center, Department of Medicine, Boston University School of Medicine, Boston, Massachusetts, 02118, USA

<sup>†</sup>Center for Thrombosis and Hemostasis, University Medical Center of the Johannes Gutenberg University Mainz, 55131, Mainz, Germany

<sup>‡</sup>Research Center for Immunotherapy (FZI), University Medical Center of the Johannes Gutenberg-University Mainz, 55131, Mainz, Germany

\*These authors contributed equally to the work.

Corresponding Author: Markus Bosmann, Associate Professor of Medicine, Pathology & Laboratory Medicine, Pulmonary Center, Department of Medicine, Boston University School of Medicine, Boston, Massachusetts, 02118, USA, Phone: +1-617-358-1225, FAX: +1-617-638-5227. E-mail: [mbosmann@bu.edu](mailto:mbosmann@bu.edu)

Figure S1

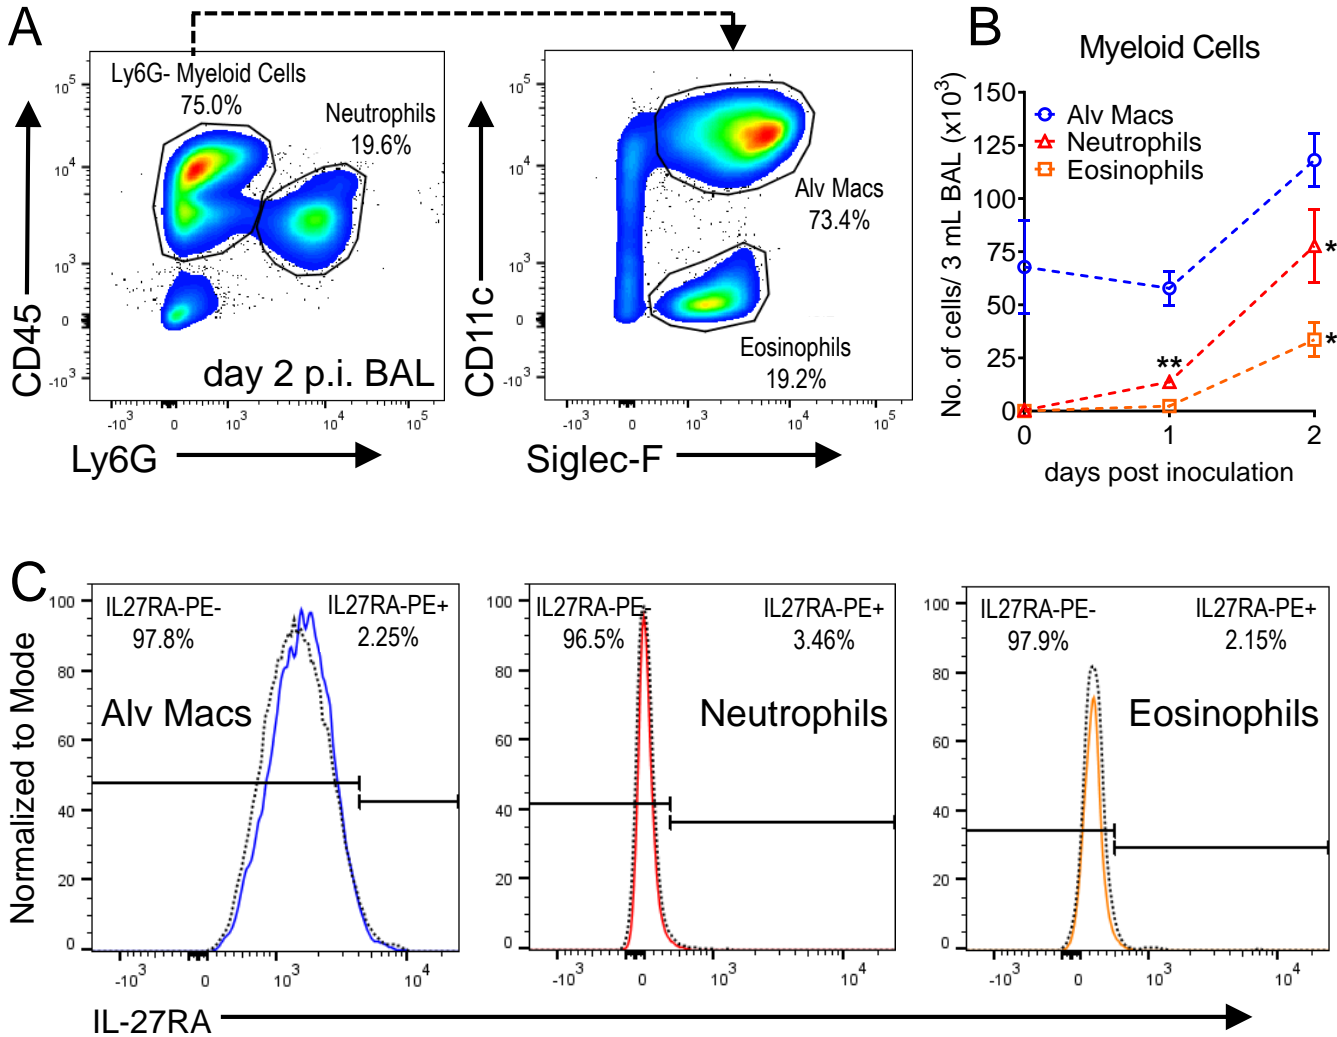

**FIGURE S1.** IL-27RA is not expressed on alveolar macrophages, neutrophils or eosinophils from the alveolar space during *N. brasiliensis* infection.

(A) Flow cytometry plots including gating strategy of CD45 versus Ly6G pre-gated on single myeloid cells (left) and CD11c versus Siglec-F on Ly6G<sup>-</sup> myeloid cells (right). Percentages are indicated next to each gate. (B) Numbers of Ly6G<sup>+</sup> neutrophils, Ly6G<sup>+</sup>CD11c<sup>+</sup>Siglec-F<sup>+</sup> alveolar macrophages and Ly6G<sup>+</sup>CD11c<sup>+</sup>Siglec-F<sup>+</sup> eosinophils on day 0 (PBS-inoculated/uninfected), day 1 and day 2 post-inoculation (n=3 mice/group) in BAL; day 0 vs. day 1 and day 0 vs. day 2 using two-tailed t-test, data shows mean  $\pm$  SEM. (C) Histograms of IL-27RA expression on Ly6G<sup>+</sup>CD11c<sup>+</sup>Siglec-F<sup>+</sup> alveolar macrophages (left), Ly6G<sup>+</sup> neutrophils (middle) and Ly6G<sup>+</sup>CD11c<sup>+</sup>Siglec-F<sup>+</sup> eosinophils (right) on day 2 p.i. The dotted line indicates isotype-FMO control. The percentages of IL-27RA<sup>-</sup> and IL-27RA<sup>+</sup> cells are indicated in the upper left and right corners, respectively.



Figure S2

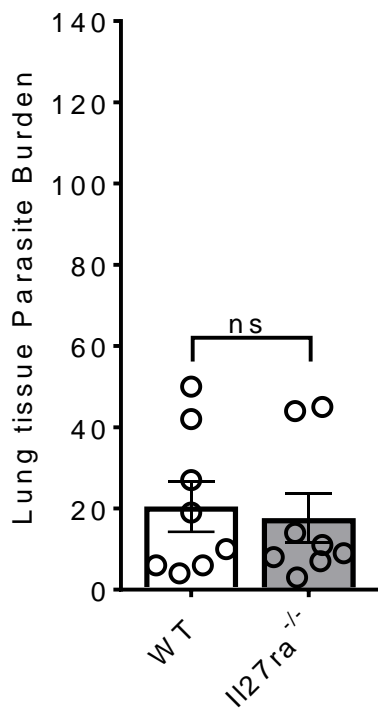

**FIGURE S2.** Parasite burdens are similar between wild type mice compared to Il27ra<sup>-/-</sup> mice in the lung tissues during *N. brasiliensis* infection.

Wild type mice (C57BL/6NJ) and Il27ra<sup>-/-</sup> mice were inoculated s.c. with L3 larvae (n=500/mouse). Parasite numbers were counted in whole lung tissues after removal of intra-airway parasites by multiple BAL on day 2 of infection. Lungs were minced from the same experiments as shown in Fig. 4A. Comparison of mean  $\pm$  SEM analyzed by two-tailed t-test and each circle indicates the value of an individual mouse, ns: not significant.

Figure S3

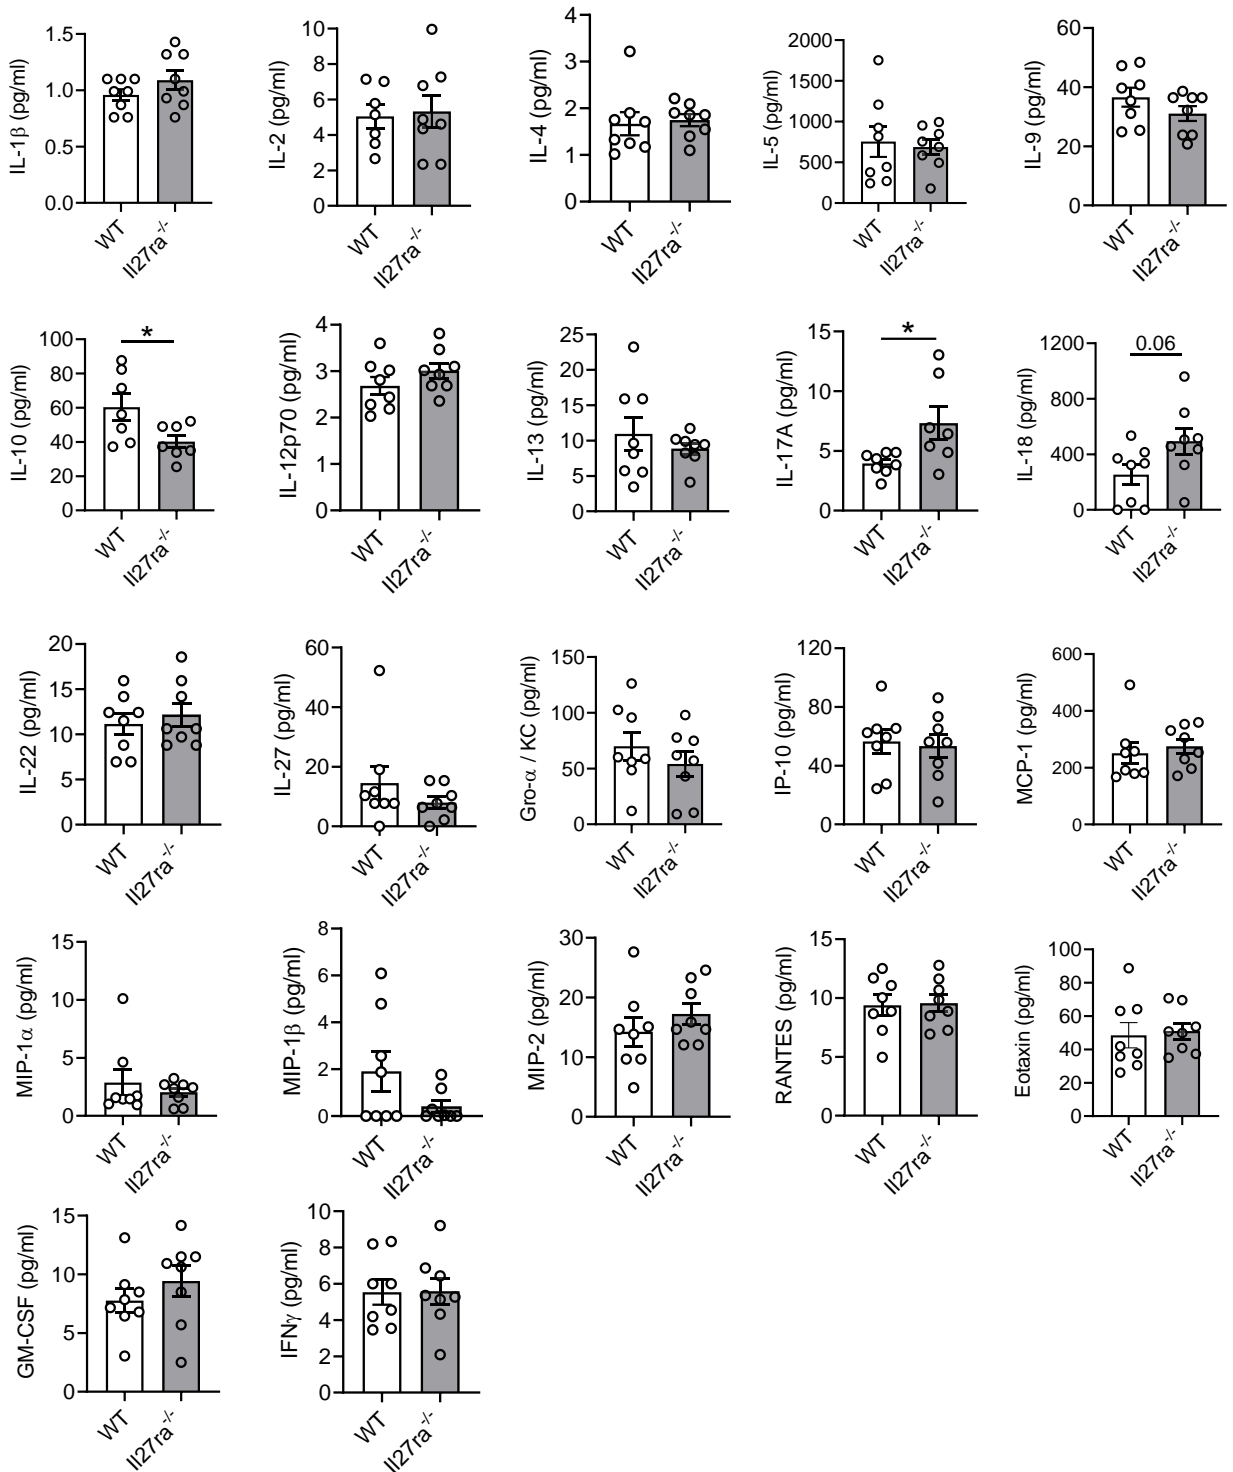

**FIGURE S3.** Cytokines and chemokines in bronchoalveolar lavage fluids of *Il27ra*<sup>-/-</sup> mice.

*In vivo* comparison of different cytokines and chemokines of *Il27ra*<sup>-/-</sup> mice and wild type (WT; C57BL/6NJ) mice during primary *N. brasiliensis* infection (L3 n=500/mouse) in BALF after 2 days, bead-based multiplex assay. Data are shown as mean  $\pm$  SEM and each circle represents an individual mouse, two-tailed t-test, \*  $P < 0.05$ , \*\*  $P < 0.01$ .

Figure S4

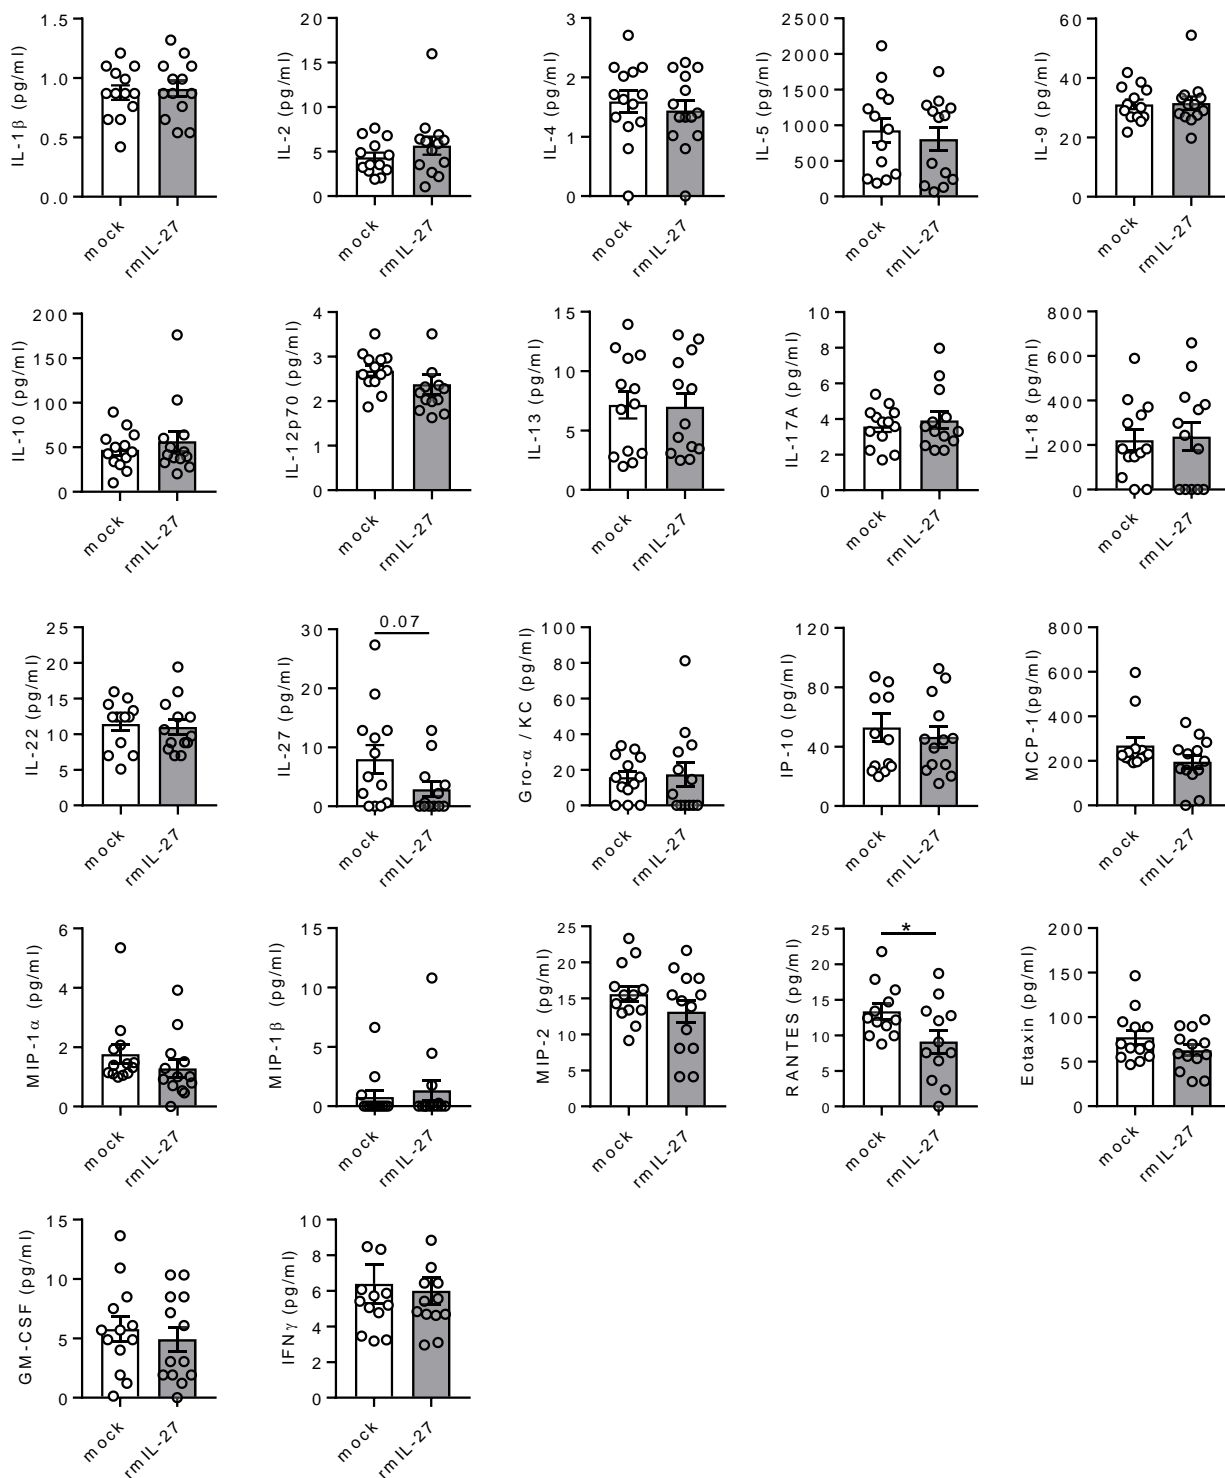

**FIGURE S4.** Cytokines and chemokines in bronchoalveolar lavage fluids after treatment with recombinant mouse IL-27.

*In vivo* comparison of mediators in BALF from WT mice (C57BL/6J) administered with rmIL-27 (100 ng/mouse i.p.) or mock control (0.1% BSA in PBS) on day 0 and day 1 of *N. brasiliensis* infection and analyzed after 2 days p.i. Data are shown as mean  $\pm$  SEM and each circle indicates an individual mouse, two-tailed t-test, \*  $P < 0.05$ .
